# Supplementary material for: Study of optical emission spectroscopy using modified Boltzmann plot in dual-frequency synchronized pulsed capacitively coupled discharges with DC bias at low-pressure in Ar/O2/C4F8 plasma etching process
Source: Royal Society of Chemistry journal article supplement (doi:10.1039/d2cp00289b), 2022-01-01
Supplement: d2cp00289b1.pdf [file d2cp00289b1.pdf]

# **Study of optical emission spectroscopy in dual frequency synchronized pulsed capacitively coupled discharges with DC bias at low-pressure in Ar/O<sub>2</sub>/C<sub>4</sub>F<sub>8</sub> plasma etching process**

**B. B. SAHU, K. NAKANE, K. ISHIKAWA, M. SEKINE, T. TSUTSUMI,  
T. GOHIRA, Y. OHYA, O. NORIYASU AND M. HORI**

- Motivation for the present OES study
- Formulation of the present work
  - ✓ Determination of deviation of plasma from LTE
  - ✓ Mathematical formulation to evaluate  $T_e$
  - ✓ Determination of  $T_e$  and validity of corona balance
- Computations of electron impact excitation rate coefficients
- Experimental results and discussion ( $T_e$  evaluation)
  - ✓ Boltzmann Plot: Excitation temperature:  $T_{ex}$
  - ✓ Modified Boltzmann equation: Electron temperature:  $T_e$
  - ✓ Variation of  $T_e$  with RF pulse condition
- Determination of plasma density ( $n_e$  evaluation)
  - Formulation of equation for  $n_e$
  - Variation of  $n_e$  with RF pulse condition
  - Validation of our result by RF compensated Langmuir probe
- Summary/Conclusion
  - ✓ Scientific aspects

# **Motivation for the present OES study**

# Motivation for the present OES study: $T_e$ evaluation

- OES is a non-intrusive diagnostic method. One can get information about plasma parameters, excited species, etc.
- Many reported works have used the mixed gas of Ar/He/Xe/Kr and the approach of trace of rare gas (TRG) for the estimation of electron temperature ( $T_e$ ) from the ratio of line intensities during the OES diagnostic. However, in the actual plasma process experiment the experimental gas contains no mixed gas of Ar/He/Ne/Xe.

Sometimes, the partial pressure of mixed gases become considerable with respect to the experimental gas for the etching or deposition process.

The plasma condition and hence, the plasma parameters would be different during the plasma diagnostics and actual plasma process.

PRE 60, 6016 (1999); J. Vac. Sci. Technol. A. 20, 555 (2002)

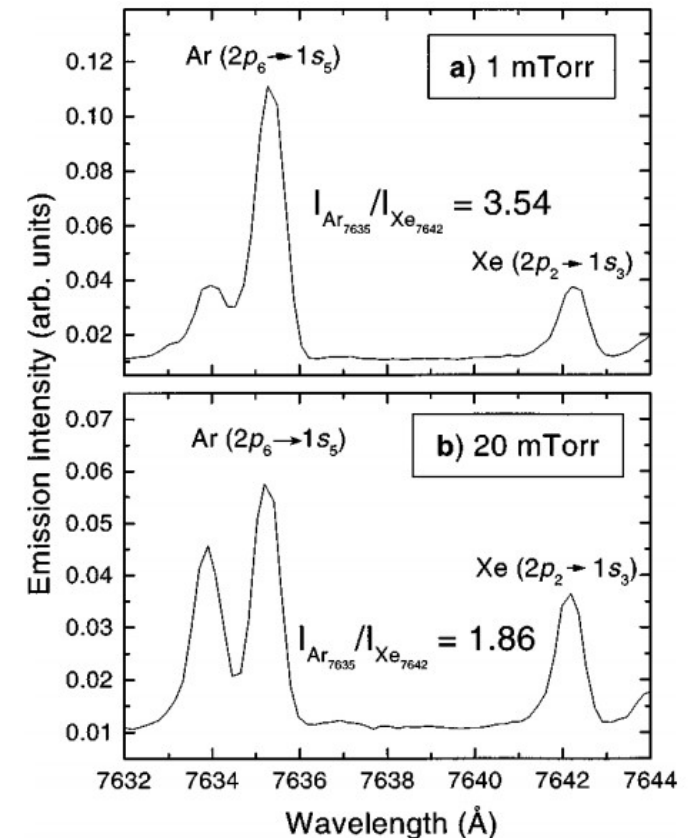

- In other method, researchers have used kinetic approach using collisional-radiative (CR) model for low-pressure  $N_2$ <sup>[2]</sup> plasmas and Ar/Ne<sup>[3]</sup> plasmas, and solve the rate balance equation using collisional-radiative (CR) model to solve for  $T_e$  and  $n_e$ .
- Note that the rate or excitation coefficients involved in the rate balance equations <sup>[2-4]</sup> used for the estimation of  $T_e$  and  $n_e$  are function of the gas temperature  $T_g$ . However, the evaluation of  $T_g$  at low-pressure plasma is not straight forward, which needs  $N_2$  gas mixing for getting the  $N_2$  emissions<sup>[5]</sup> or additional methods like laser-induced fluorescence (LIF)<sup>[6]</sup> and Fabry-Perot Interferometry<sup>[7]</sup>.
- Some studies in Ar/Ne plasmas, the line intensity ratios are used to determine the value of  $T_e$ .
- Thus, at low-pressure, there is no straight forward and simplified method using OES of Ar containing plasmas to determine  $T_e$  in non-equilibrium plasmas.

[2] Plasma Sources Sci. Technol. 17, 024002 (2008); [3] J. Phys. D: Appl. Phys. 42, 025203 (2009);

[4] Resource Eff. Technol. 3, 187 (2017), [5] J. Phys. D: Appl. Phys. 40, 1022 (2007); [6] Plasma Sources Sci. Technol. 23 023001 (2014) review paper by Bruggeman. [7] B. Xu, Y. M. Liu, D. N. Wang, and J. Q. Li, "Fiber Fabry-Pérot Interferometer for Measurement of Gas Pressure and Temperature," J. Lightwave Technol. 34, 4920-4925 (2016)

- Considerable work in the literature has also been done at very high pressures and/or atmospheric pressures. Such discharges, assume the condition of partial local thermal equilibrium (LTE) that approximate the electron excitation temperature  $T_{ex} \sim T_e$  using Boltzmann plot.<sup>[8-10]</sup>
- At low-pressure and low-to-moderate density plasmas, the excited atomic/ionic densities are not in Boltzmann equilibrium; that is, excitation and de-excitation are not controlled by collisions with electrons. In such cases, the use of Boltzmann plot only provides  $T_{ex}$  and not the  $T_e$ .
- In glow discharges, at low-pressure with low-neutral density ( $\sim 10^{13}$ - $10^{15}$  cm<sup>-3</sup>) and low-to moderate electron density ( $\sim 10^8$ - $10^{12}$  cm<sup>-3</sup>), multi-step ionization would be important. Accordingly, with increasing electron density ( $n_e$ ), multi-step excitation of the metastable level  $1s_5$  via the excited Ar and resonant states  $1s_2$ ,  $1s_3$  and  $1s_4$  could be dominant [10]. However, at low electron densities and pressures (a few Pa), the formation of  $1s_5$  can predominantly occurs from the ground state Ar by direct excitation.

- Earlier plasma density measurements<sup>[12, 13]</sup> by surface wave probe (in our center's work) have shown an overall plasma/electron density ( $n_e$ ) variation in the range of  $\sim 10^{10}$  -  $10^{11}$   $\text{cm}^{-3}$  at a low discharge power.
- Due to the low electron densities  $\sim 10^{10}$  -  $10^{11}$   $\text{cm}^{-3}$  (our center's work), it is possible that direct excitation from the ground state along with radiative decay can be the dominant mechanisms.
- Thus, the direct excitation<sup>[14]</sup> mechanism will control the generation and destruction of excited levels, hence, a corona balance could drive the plasma kinetics in our experiments.
- We need to validate the corona balance formalism proposed by Fujimoto<sup>[15]</sup> relevant to our experiment and plasma parameters.
- Thus,  $T_e$  can be determined using Ar emissions straight forward from the OES emission lines. Also, we can determine electron density by combining Saha and Maxwell-Boltzmann equations.
- Simultaneous determination of both  $T_e$  and  $n_e$  will provide better insight of the etching processes along with the capability of plasma sources.

[12] Jpn. J. Appl. Phys. 55, 080309 (2016). [13] J. Phys. D. 50, 155201 (2017);

[14] Phys. Rep. 191, 109 (1990); [15] J. Phys. Soc. Japan 47, 273 (1979).

# Formulation of the present work

- Determination of deviation of plasma from LTE
- Mathematical formulation to evaluate  $T_e$
- Determination of  $T_e$  and validity of corona balance



# Description of macroscopic/microscopic state of plasma 9

- Velocity distribution: by Maxwell Equation
  - The excited state distribution: by Boltzmann Equation
  - The relation between the densities of ionic states: by Saha Equation
  - The distribution of the photon gas: by Planck's radiation law.
- ✓ In thermodynamic equilibrium
- All these distributions are characterized by the same temperature.
  - Every detailed microscopic process is balanced by its inverse process.

Various microscopic processes occur in plasmas during process

| Nature of balance | Reaction scenario in the plasmas                                                                                                                        | Physical situation                                                                                                      |
|-------------------|---------------------------------------------------------------------------------------------------------------------------------------------------------|-------------------------------------------------------------------------------------------------------------------------|
| Maxwell balance   | $X + Y \leftrightarrow X + Y$ $E_X + E_Y = (E_X - \Delta E) + (E_Y + \Delta E)$                                                                         | Kinetic energy exchange ( $\Delta E$ ) and conservation                                                                 |
| Boltzmann balance | $X + A_l + E_{\text{internal energy}} \leftrightarrow X + A_u$ <p><math>A_l</math> = atom in a lower state <math>l</math></p>                           | De-excitation $\leftarrow$ $\rightarrow$ Excitation                                                                     |
| Saha balance      | $X + A_p +  E_p  \leftrightarrow X + A_l^+ + e$ <p><math>E_p</math> = ionization energy of atom<br/><math>A_p</math> = atom in state <math>p</math></p> | Recombination $\leftarrow$ $\rightarrow$ ionization                                                                     |
| Plank balance     | $A_u \leftrightarrow A_l + h\nu$ $A_u + h\nu \leftrightarrow A_l + 2h\nu$                                                                               | Absorption $\leftarrow$ $\rightarrow$ Spontaneous emission<br>Absorption $\leftarrow$ $\rightarrow$ Stimulated emission |

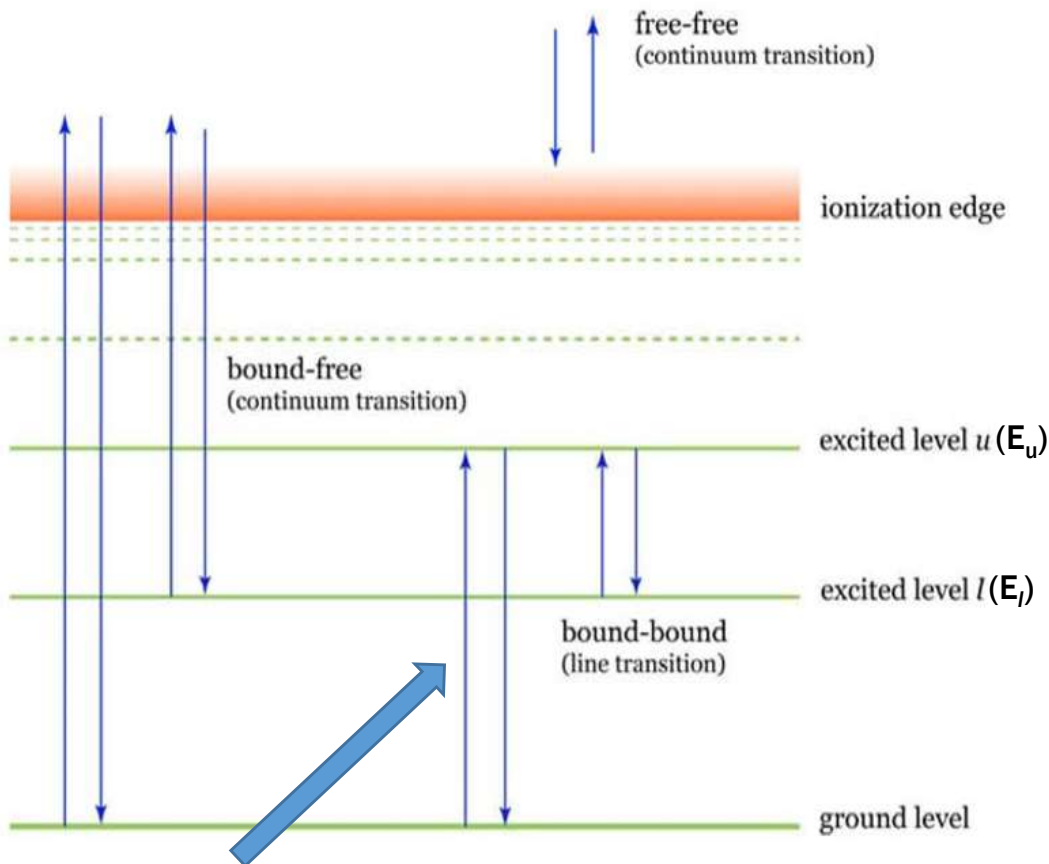

**Direct excitation  
from ground state**

**Absorption:**

Upper energy level:  $h \nu + E_l \rightarrow E_u$

**Spontaneous Emission:**

From upper energy level:

$E_u \rightarrow E_l + h \nu$

**Stimulated Emission:**

From upper energy level:

$h \nu + E_u \rightarrow E_l + 2 h \nu$

To apply the conventional Boltzmann plot, we consider (assume) the upper excited energy levels of the selected (observed in our experiments) transition are in LTE. This suggests that the population density of such energy levels follow the Boltzmann equation.

## Observed dominant emissions from Ar lines

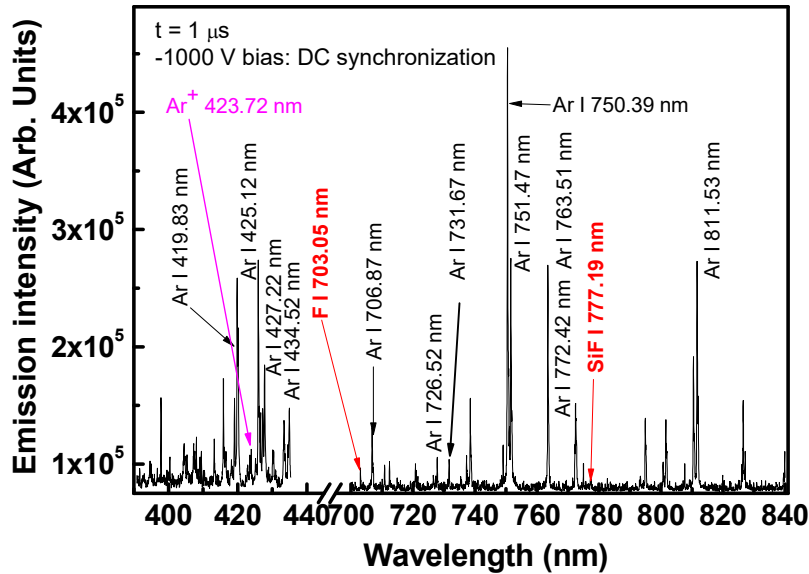

The excitation temperature ( $T_{ex}$ ) can give the first estimation of  $T_e$  in the low pressure Ar rich/ $O_2/C_4F_8$  plasma.

$T_{ex}$  can be determined as

$$\ln \left( \frac{g_u \cdot A_{ul}}{I_{ul} \cdot \lambda_{ul}} \right) = \frac{E_u}{k_B T_{ex}} + \text{Constant} \quad (1)$$

$$\Rightarrow \frac{E_u}{k_B T_{ex}} = \ln \left( \frac{g_u \cdot A_{ul}}{I_{ul} \cdot \lambda_{ul}} \right) + C_1$$

where

$I_{ul}$  = Emission intensity (in arb. Unit) of the emission between the upper energy levels  $u$  and the lower energy level  $l$

$g_u$  = Statistical weight of emitting level  $u$  relevant to the transition  $u \rightarrow l$

$A_{ul}$  = transition probability in  $s^{-1}$  corresponding to the radiative emissions

$E_u$  = Excitation energy (eV) of upper level  $u$

$k_B$  = Boltzmann constant

$C_1$  = Constant

Spectrum acquired for the operation condition:

With synchronization (time  $t = 1 \mu s$ )

DC bias = -300 V (RF on)

= -1000 V (RF off)

[8] Surf. Coat. Technol. 364, 63 (2019)

[9] J. Anal. At. Spectrom. 32, 782 (2017)

# Table I: Spectroscopic data and parameters

| $\lambda_{ul}$<br>(nm) | $E_u$ (eV) | $g_u$ | $A_{ul}$ ( $10^7$ s $^{-1}$ ) | Transition levels<br>$E_u \rightarrow E_l$ | $p_u$ | $f_{lu}$              |
|------------------------|------------|-------|-------------------------------|--------------------------------------------|-------|-----------------------|
| 419.83                 | 14.58      | 1     | 0.257                         | 5p[1/2] $_0 \rightarrow$ 4s[3/2] $_1^0$    | 3.395 | $2.26 \times 10^{-3}$ |
| 425.12                 | 14.46      | 3     | 0.0111                        | 5p[1/2] $_1 \rightarrow$ 4s[3/2] $_2^0$    | 3.234 | $1.81 \times 10^{-4}$ |
| 427.22                 | 14.52      | 3     | 0.0797                        | 5p[3/2] $_1 \rightarrow$ 4s[3/2] $_1^0$    | 3.312 | $2.18 \times 10^{-3}$ |
| 434.52                 | 14.66      | 3     | 0.0297                        | 5p'[3/2] $_1 \rightarrow$ 4s'[1/2] $_1^0$  | 3.516 | $8.41 \times 10^{-4}$ |
| 706.87                 | 14.84      | 5     | 0.20                          | 6s[3/2] $_1^0 \rightarrow$ 4p[5/2] $_2$    | 3.845 | $1.35 \times 10^{-2}$ |
| 726.52                 | 14.86      | 3     | 0.017                         | 4d[3/2] $_1^0 \rightarrow$ 4p[3/2] $_1$    | 3.887 | $4.99 \times 10^{-2}$ |
| 731.67                 | 15.02      | 3     | 0.096                         | 6s'[1/2] $_1^0 \rightarrow$ 4p'[1/2] $_1$  | 4.287 | $3.37 \times 10^{-2}$ |
| 750.39                 | 13.48      | 1     | 4.450                         | 4p'[1/2] $_0 \rightarrow$ 4s'[1/2] $_1^0$  | 2.442 | $1.25 \times 10^{-1}$ |
| 751.47                 | 13.27      | 1     | 4.020                         | 4p[1/2] $_0 \rightarrow$ 4s[3/2] $_1^0$    | 2.337 | $1.14 \times 10^{-1}$ |
| 763.51                 | 13.17      | 5     | 2.452                         | 4p[3/2] $_2 \rightarrow$ 4s[3/2] $_2^0$    | 2.291 | $2.14 \times 10^{-1}$ |
| 772.42                 | 13.33      | 3     | 1.170                         | 4p'[1/2] $_1 \rightarrow$ 4s'[1/2] $_0^0$  | 2.366 | $3.14 \times 10^{-1}$ |
| 811.53                 | 13.08      | 7     | 3.310                         | 4p[5/2] $_3 \rightarrow$ 4s[3/2] $_2^0$    | 2.253 | $4.58 \times 10^{-1}$ |

The main sources of error using Eqn. (1) for  $T_{\text{ex}}$  estimation arise from the inaccurate  $A_{\text{lu}}$  and acquired emission intensities  $I_{\text{lu}}$ . However, the use of logarithmic operation on the lhs shrinks the extent of error.

As an example: An error of 15 % in the argument of Eqn. (1) shrinks to  $\rightarrow$  2 % of error by the logarithmic operation

At low-pressure condition: The condition LTE is difficult to hold since the population density of excited (atom) states will not be in Boltzmann equilibrium.

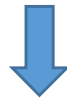

The excitation and de-excitation process might not be crucially controlled by electronic collisions

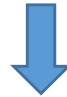

$T_{\text{ex}}$  will be different from  $T_e$

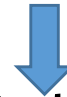

Thus, the fitted lines satisfying the Boltzmann equilibrium will not follow/overlap the data points

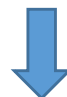

Thus, there is departure/deviation of plasma from LTE

To know about the deviation of plasma from LTE and to determine  $T_e$ , we consider the formation of the effective principal quantum number  $p_u$ <sup>[14]</sup> for the excited states as

$$p_u = \sqrt{\frac{E_H}{E_{Ar} - E_u}} \quad (2)$$

[14] Phys. Rep. 191, 109 (1990);

$E_H = 13.6$  eV, the Rydberg constant

$E_{Ar} = 15.76$  eV, the ionization energy of atomic species of Ar

$E_u =$  Excitation energy (eV) of excited level u

we further define the parameter  $s_u(p_u)$

$$s_u(p_u) = \frac{N_u(p_u)}{N_u^s(p_u)} \quad (3)$$

$N_u(p_u) =$  population density of the excited state u

$N_u^s(p_u) =$  population density of the excited state u in Saha Equilibrium

if  $N_u(p_u) > N_u^s(p_u)$ :  $s_u(p_u) > 1$  When the excited states will be over populated, we can get this feature.

The density of energy level is larger than the value required to maintain Saha equilibrium.

The scenario suggests the plasma to be ionizing in nature

The **Saha** equation (or equilibrium) describes the degree of ionization for any gas in thermal **equilibrium** as a function of the temperature, density, and ionization energies of the atoms

if  $N_u(p_u)$ ,  $N_u^s(p_u)$ :  $s_u(p_u) < 1$  → The scenario suggests the plasma can be of recombining in nature

- Note that the degree of ionization<sup>[19]</sup> at a low-pressure in RF plasmas is very small  $\sim 10^{-6} - 10^{-3}$  which corresponds to a very low  $\sim 10^9 - 10^{11} \text{ cm}^{-3}$ .
- The plasmas with low-electron density would make the collisional process less effective than those with high electron density. This suggests the dominance of radiative processes.
- In the case of non-equilibrium plasmas with corona balance<sup>[14]</sup>, there will be the balance between the populating and depopulating mechanism.
- The densities of excited states by the electron-impact excitation from the ground state can be termed as the populating mechanism, and the process of spontaneous emission can be thought as the depopulating mechanism.
- The corona balance process can be expressed as

$$n_e N_1 k_{1u}(p_u) = N_u(p_u) \sum_{u>l} A_{ul} \quad (4)$$

$n_e$  = electron density;

$N_1$  = Ground state population density

$k_{1u}(p_u)$  = rate coefficient for electron impact excitation from the ground state 1 to excited level u;

$N_u(p_u)$  = population density of the excited state u

- We consider an optical thin plasma in Eqn. (4) for all radiated emissions. The  $N_u(p_u)$  can be determined for each relevant emission from level  $E_u$

$$I_{ul} = \frac{h\nu_{ul}}{4\pi} A_{ul} N_u(p_u) L_{pl} \Rightarrow N_u(p_u) = \frac{4\pi}{h} \frac{\lambda_{ul}}{c} \frac{I_{ul}}{A_{ul}} \frac{1}{L_{pl}} \quad (5)$$

$c$  = speed of light in vacuum;

$L_{pl}$  = effective plasma length that emitted light radiation has to travel through

- We assume that the free electrons obey the Maxwellian EEDF so that we can express the rate coefficient  $k_{1u}(p_u)$  for Ar as follows<sup>[20,21]</sup>:

$$k_{1u}(p_u) = 8.68 \times 10^{-8} c_{1u} Z_{eff}^{-3} f_{lu} \times \frac{u_a^{3/2}}{u_{1u}} \xi_a(u_{1u}, \beta_{1u}) \frac{cm^3}{s} \quad (6)$$

$Z_{eff}$  = effective charge/atomic number = 1 (for Ar<sup>+</sup> ion)

$c_{1u}$  = a constant  $\cong 1$

$f_{lu}$  = Absorption oscillator strength for the transition  $l \rightarrow u$ <sup>[22,23]</sup>

$u_a = 13.6 k_B T_e$  (eV)

$u_{1u} = (E_1 - E_u)/k_B T_e$

$\beta_{1u}$  = a constant =  $1 + [(Z_{eff}-1)/(Z_{eff}+1)] = 1$

[20] H. W. Drawin, "Collision and Transport Cross Sections," Report EUR-CEA-FC-383, Association Euratom C.E.A., Fontenay-aux-Roses, France (1967). [21] R. D. Taylor, and A. W. Ali, J. Appl. Phys. 64, 89 (1988); [22] C. H. Corliss and J. B. Shumaker, Jr., J. Res. Natl. Bur. Stand. (U.S.), Sect. A 71, 575–581 (1967); [23] J. Phys. B: At. Mol. Opt. Phys. 39, 2145 (2006).



- The function  $\xi_a(u_{1u}, \beta_{1u})$  can be determined<sup>[21]</sup> as

$$\xi_a(u_{1u}, \beta_{1u}) = \frac{e^{-u_{1u}}}{1 + u_{1u}} \cdot \left( \frac{1}{20 + u_{1u}} + \ln \left\{ 1.25 \times \left( 1 + \frac{1}{u_{1u}} \right) \right\} \right) \quad (7)$$

- Using equations (6) and (7) we can further define the magnitude for rate coefficient  $k_{1u}(p_u)$  by electron-impact by a convenient and simpler expression with a functional dependence on  $T_e$

$$k_{1u}(p_u) = d_{1u}(p_u) \cdot e^{-E_{1u}/k_B T_e} \quad \frac{cm^3}{s} \quad (8)$$

- Where the parameter  $d_{1u}(p_u)$  is given by

$$d_{1u}(p_u) = E_{1u}^y \cdot p_u^z \quad (9)$$

Where the exponent  $y$  and  $z$  can be determined from the fitting of the curves using Eqn. (8) and (9).

- Substituting the value of  $k_{1u}(p_u)$  from Eqn. (4) in Eq (8) we can get

$$\ln \left\{ \frac{N_u(p_u) \sum_{u>l} A_{ul}}{n_e N_1} \right\} = \ln \{ d_{1u}(p_u) \} - \frac{E_{1u}}{k_B T_e} \quad (10)$$

- Substituting Eqn. (5) in Eqn. (10) we get

$$\frac{E_{1u}}{k_B T_e} = \ln \left\{ \frac{A_{ul} d_{1u}(p_u)}{\lambda_{ul} I_{ul} \sum_{u>l} A_{ul}} \right\} + C_2 \quad (11) \quad C_2 = \ln \left\{ \frac{4 \cdot \pi}{h c n_e N_1 L_{pl}} \right\} \quad \text{is a constant}$$

- Equations (11) represents the equation of a straight line, and the slope of the line will give the direct value of  $T_e$  in non-equilibrium plasmas satisfying the corona balance condition. We need to validate the the corona balance formalism.
- For this, we recall our earlier studies of plasma density measurement by surface wave probe

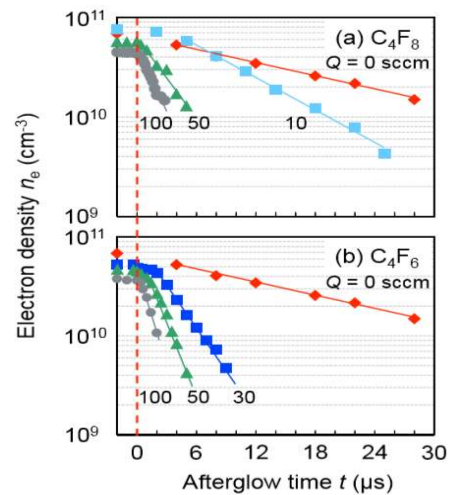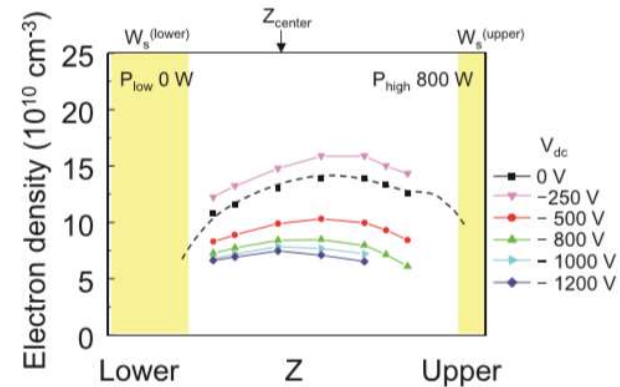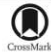

## Spatial profiles of interelectrode electron density in direct current superposed dual-frequency capacitively coupled plasmas

- To validate the the corona balance formalism, we need to varify that, since the plasma is optically thin (low to moderate density  $\sim 10^9$  to  $10^{11}$   $\text{cm}^{-3}$ ), the relative population densities of the energy levels  $u$  of Ar (species we used for the present diagnosis) follow the expression<sup>[15]</sup>

$$\frac{N_u(p_u)}{g_u(p_u)} \propto p_u^{-a} \quad (12)$$

- When  $a = 0.5 \rightarrow n_e \sim 10^6 \text{ cm}^{-3}$
- The corona balance extends to levels with  $p_u$  values up to approximately 20. <sup>[15]</sup>
- As the exponent increase from  $a = 0.5$  to  $a = 3$  the  $n_e$  increases from  $\sim 10^6 \text{ cm}^{-3}$  to  $10^{10} \text{ cm}^{-3}$
- For this case, the corona balance is only probable in excited states with values of  $p_u$  up to 7.
- Also, there can be  $n_e \sim 10^{11} \text{ cm}^{-3}$  with corona balance value for  $p_u$  between 2 and to 4 (relevant to our case) for  $a \leq 6$ .

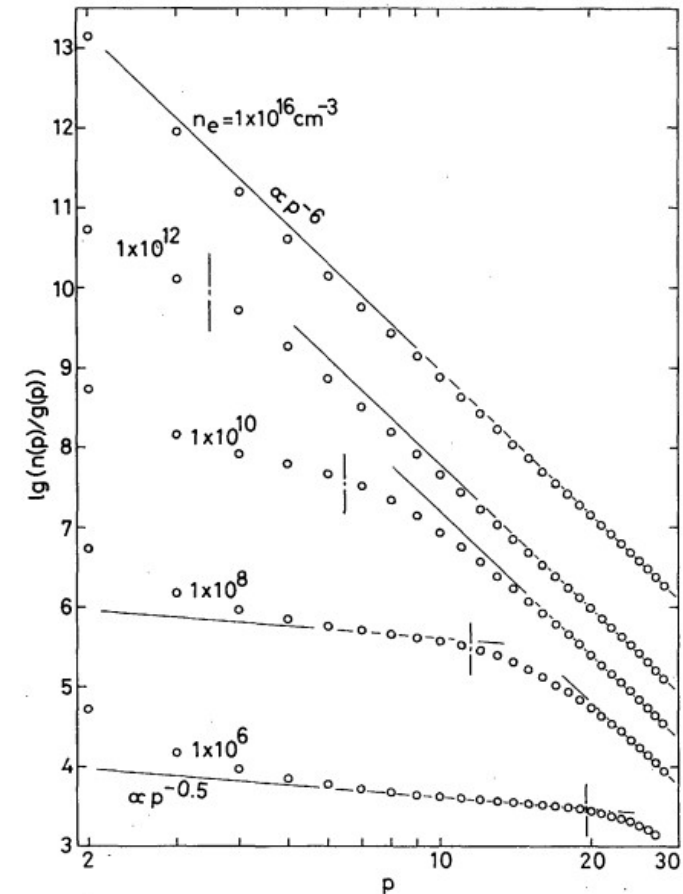

# Experimental parameters

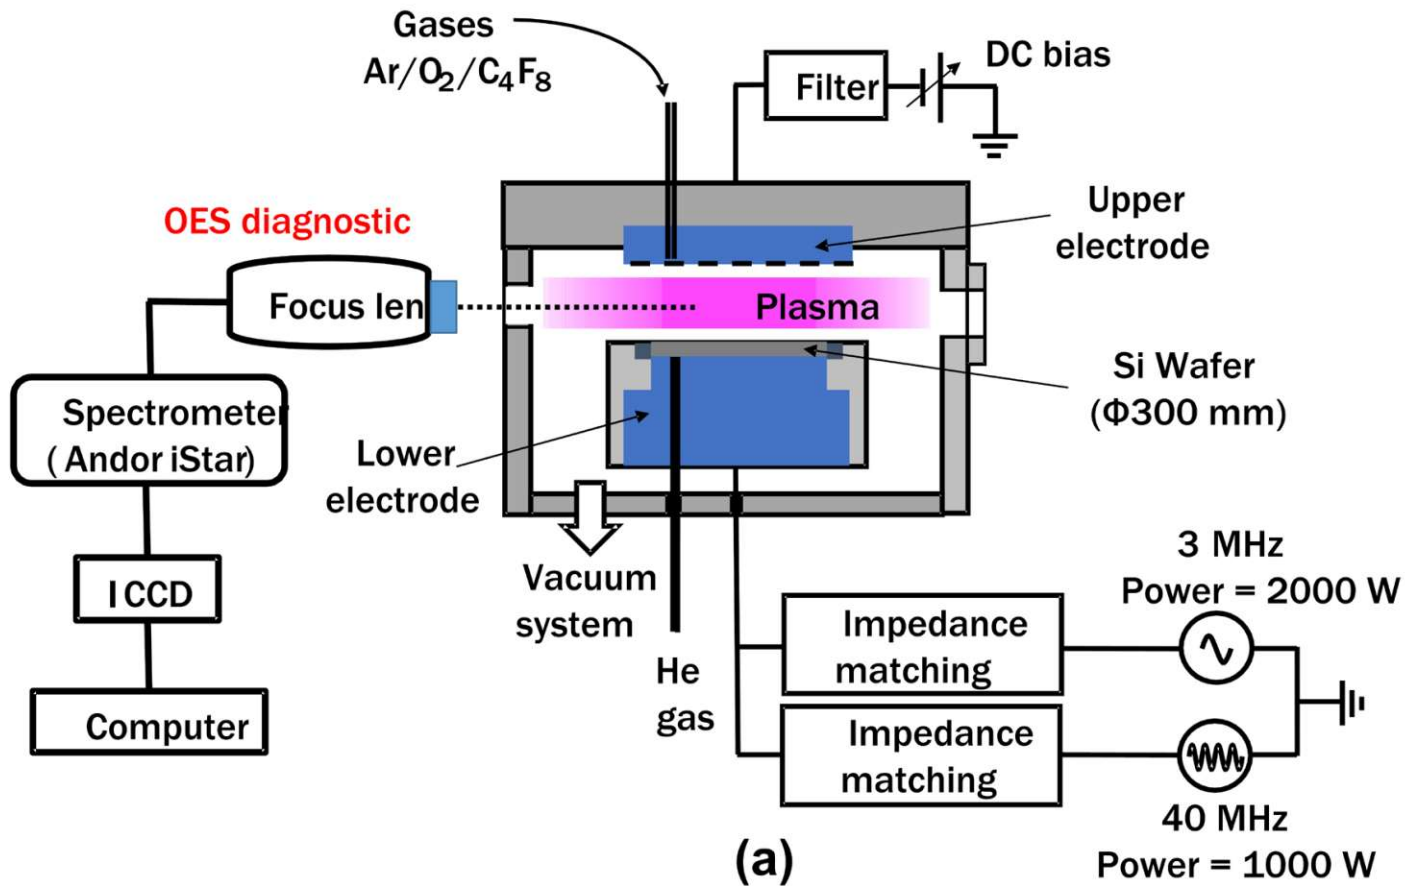

| Conditions       |                                               |
|------------------|-----------------------------------------------|
| Gas:             | $C_4F_8$ / Ar / $O_2$<br>= 60 / 300 / 30 sccm |
| Pressure:        | 2 Pa                                          |
| RF power:        | 40 / 3 MHz<br>= 1000 / 2000 W                 |
| Pulse frequency: | 10 kHz                                        |
| Duty ratio:      | 60%                                           |
| DC bias:         | -300 V (RF-on)<br>-1000 V (RF-off)            |

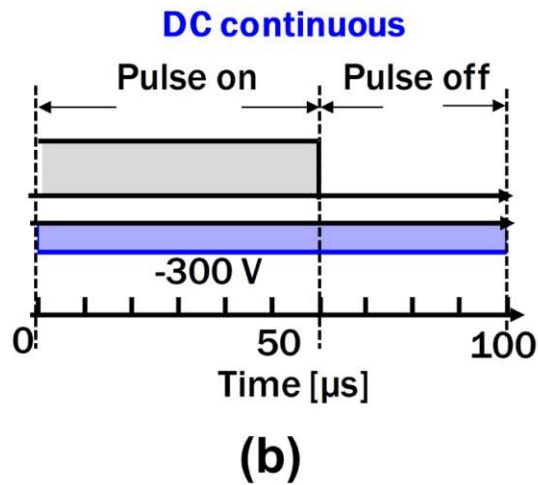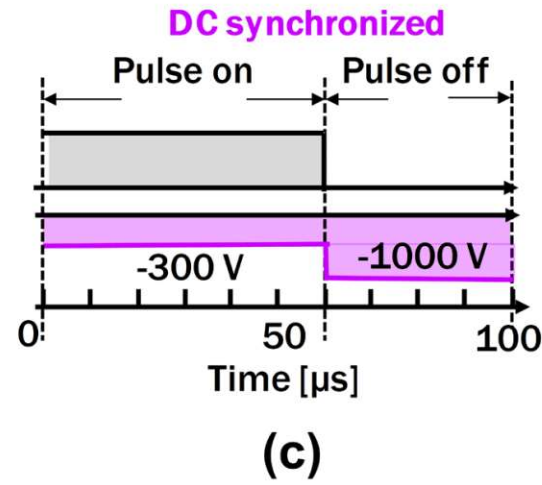

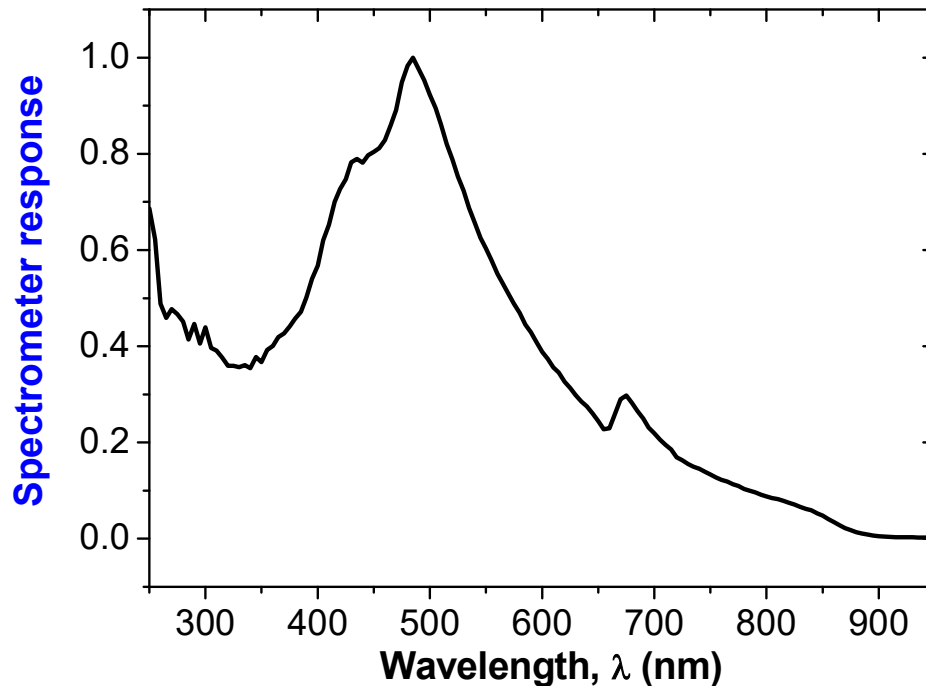

Grating-2: Andor 1200-300

Optical Fiber: 1

curves corresponding to the spectral response of the fiber + Grating + ICCD chain

Actual line intensity  $I_a = I / f$

$I$  = Measured spectral line intensity

$F$  = Spectrometer response

$$\ln\left(\frac{g_u \cdot A_{ul}}{I_{ul} \cdot \lambda_{ul}}\right) = \frac{E_u}{k_B T_{ex}} + C_1$$

In our case, the correction term is accommodated in constant  $C_1$ .

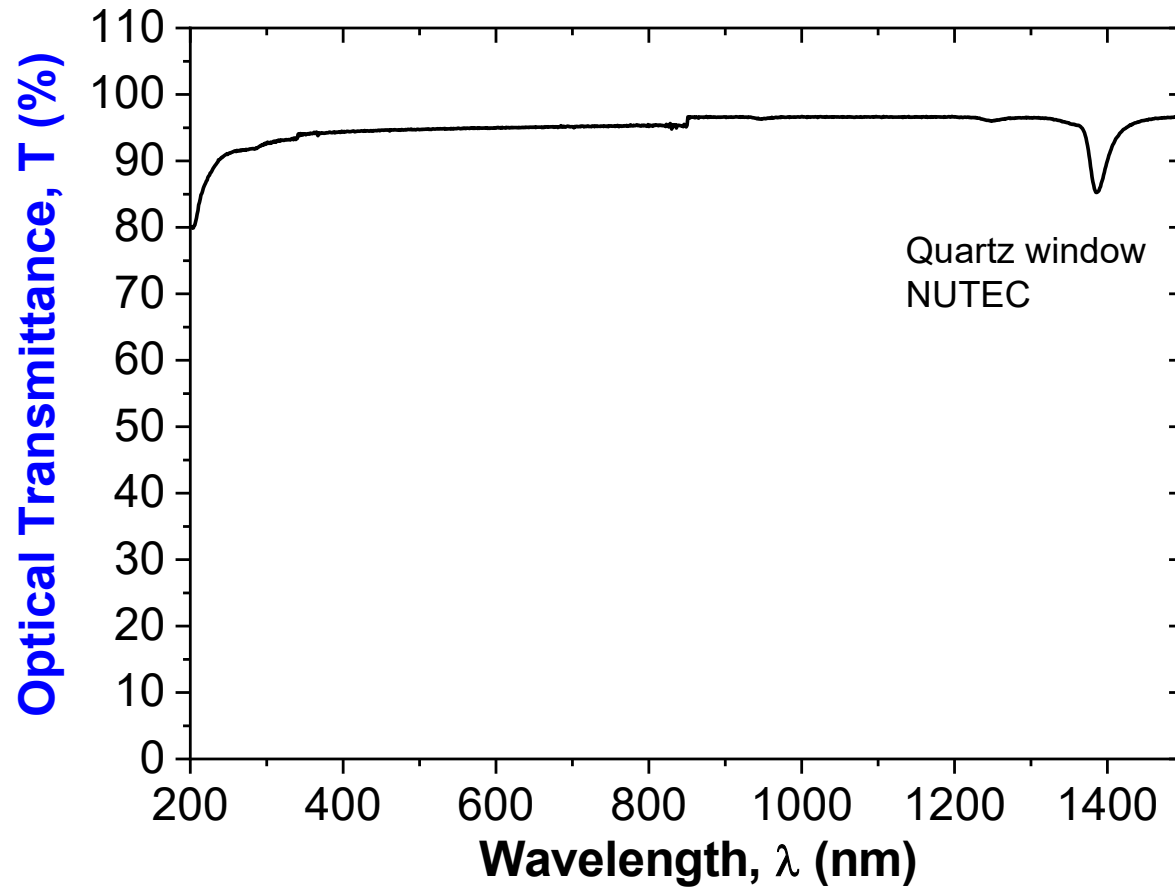

The window can accommodate broad range of wavelengths for the OES

# Computations of electron impact excitation rate coefficients

- Comparison with our data with existing literature of JAP paper
- Computation of parameters  $y$  and  $z$



# Table I: Spectroscopic parameters

| $\lambda_{ul}$<br>(nm) | $E_u$ (eV) | $g_u$ | $A_{ul}$ ( $10^7$ s $^{-1}$ ) | Transition levels<br>$E_u \rightarrow E_l$ | $p_u$ | $f_{lu}$              |
|------------------------|------------|-------|-------------------------------|--------------------------------------------|-------|-----------------------|
| 419.83                 | 14.58      | 1     | 0.257                         | 5p[1/2] $_0 \rightarrow$ 4s[3/2] $_1^0$    | 3.395 | $2.26 \times 10^{-3}$ |
| 425.12                 | 14.46      | 3     | 0.0111                        | 5p[1/2] $_1 \rightarrow$ 4s[3/2] $_2^0$    | 3.234 | $1.81 \times 10^{-4}$ |
| 427.22                 | 14.52      | 3     | 0.0797                        | 5p[3/2] $_1 \rightarrow$ 4s[3/2] $_1^0$    | 3.312 | $2.18 \times 10^{-3}$ |
| 434.52                 | 14.66      | 3     | 0.0297                        | 5p'[3/2] $_1 \rightarrow$ 4s'[1/2] $_1^0$  | 3.516 | $8.41 \times 10^{-4}$ |
| 706.87                 | 14.84      | 5     | 0.20                          | 6s[3/2] $_1^0 \rightarrow$ 4p[5/2] $_2$    | 3.845 | $1.35 \times 10^{-2}$ |
| 726.52                 | 14.86      | 3     | 0.017                         | 4d[3/2] $_1^0 \rightarrow$ 4p[3/2] $_1$    | 3.887 | $4.99 \times 10^{-2}$ |
| 731.67                 | 15.02      | 3     | 0.096                         | 6s'[1/2] $_1^0 \rightarrow$ 4p'[1/2] $_1$  | 4.287 | $3.37 \times 10^{-2}$ |
| 750.39                 | 13.48      | 1     | 4.450                         | 4p'[1/2] $_0 \rightarrow$ 4s'[1/2] $_1^0$  | 2.442 | $1.25 \times 10^{-1}$ |
| 751.47                 | 13.27      | 1     | 4.020                         | 4p[1/2] $_0 \rightarrow$ 4s[3/2] $_1^0$    | 2.337 | $1.14 \times 10^{-1}$ |
| 763.51                 | 13.17      | 5     | 2.452                         | 4p[3/2] $_2 \rightarrow$ 4s[3/2] $_2^0$    | 2.291 | $2.14 \times 10^{-1}$ |
| 772.42                 | 13.33      | 3     | 1.170                         | 4p'[1/2] $_1 \rightarrow$ 4s'[1/2] $_0^0$  | 2.366 | $3.14 \times 10^{-1}$ |
| 811.53                 | 13.08      | 7     | 3.310                         | 4p[5/2] $_3 \rightarrow$ 4s[3/2] $_2^0$    | 2.253 | $4.58 \times 10^{-1}$ |

# Table II: Possible radiative transitions for emitted lines

| $\lambda_{ul}$ (nm) | Possible radiative Transitions<br>$E_u \rightarrow E_l$ ( $u>l$ )                                                                                                                                                                      | No of radiative transitions | $\sum_{u>l} A_{ul}$<br>( $10^7$ s $^{-1}$ ) | y       | z      |
|---------------------|----------------------------------------------------------------------------------------------------------------------------------------------------------------------------------------------------------------------------------------|-----------------------------|---------------------------------------------|---------|--------|
| 419.83              | $5p[1/2]_0 \rightarrow 4s[3/2]_1^0, 5p[1/2]_0 \rightarrow 4s'[1/2]_1^0$                                                                                                                                                                | 2                           | 0.375                                       | -8.305  | -2.624 |
| 425.12              | $5p[1/2]_1 \rightarrow 4s[3/2]_2^0, 5p[1/2]_1 \rightarrow 4s[1/2]_0^0,$<br>$5p[1/2]_1 \rightarrow 4s'[1/2]_0^0, 5p[1/2]_1 \rightarrow 4s'[1/2]_1^0$                                                                                    | 4                           | 0.08488                                     | -9.445  | -2.53  |
| 427.22              | $5p[3/2]_1 \rightarrow 4s[3/2]_1^0, 5p[3/2]_1 \rightarrow 4s'[1/2]_1^0,$<br>$5p[3/2]_1 \rightarrow 4s[3/2]_2^0, 5p[3/2]_1 \rightarrow 4s'[1/2]_0^0$                                                                                    | 4                           | 0.11797                                     | -7.575  | -4.487 |
| 434.52              | $5p'[3/2]_1 \rightarrow 4s'[1/2]_1^0, 5p'[3/2]_1 \rightarrow 4s[3/2]_1^0,$<br>$5p'[3/2]_1 \rightarrow 4s[3/2]_2^0, 5p'[3/2]_1 \rightarrow 4s'[1/2]_0^0$                                                                                | 4                           | 0.0324                                      | -6.575  | -6.921 |
| 706.87              | $6s[3/2]_1^0 \rightarrow 4p[5/2]_2, 6s[3/2]_1^0 \rightarrow 4p[1/2]_1,$<br>$6s[3/2]_1^0 \rightarrow 4p[3/2]_1, 6s[3/2]_1^0 \rightarrow 4p[3/2]_2,$<br>$6s[3/2]_1^0 \rightarrow 4p[1/2]_0$                                              | 5                           | 0.5191                                      | -6.30   | -4.621 |
| 726.52              | $4d[3/2]_1^0 \rightarrow 4p[3/2]_1, 4d[3/2]_1^0 \rightarrow 4p[1/2]_0,$<br>$4d[3/2]_1^0 \rightarrow 4p'[3/2]_1, 4d[3/2]_1^0 \rightarrow 4p'[1/2]_1$                                                                                    | 4                           | 0.0173                                      | -6.275  | -3.617 |
| 731.67              | $6s'[1/2]_1^0 \rightarrow 4p'[1/2]_1, 6s'[1/2]_1^0 \rightarrow 4p'[1/2]_0,$<br>$6s'[1/2]_1^0 \rightarrow 4p'[3/2]_2, 6s'[1/2]_1^0 \rightarrow 4p'[3/2]_1,$<br>$6s'[1/2]_1^0 \rightarrow 4p[3/2]_2, 6s'[1/2]_1^0 \rightarrow 4p[5/2]_2$ | 6                           | 0.4559                                      | -3.987  | -7.605 |
| 750.39              | $4p'[1/2]_0 \rightarrow 4s'[1/2]_1^0, 4p'[1/2]_0 \rightarrow 4s[3/2]_1^0$                                                                                                                                                              | 2                           | 4.4736                                      | -6.95   | -5.735 |
| 751.47              | $4p[1/2]_0 \rightarrow 4s[3/2]_1^0, 4p[1/2]_0 \rightarrow 4s'[1/2]_1^0$                                                                                                                                                                | 2                           | 4.104                                       | -9.991  | 2.725  |
| 763.51              | $4p[3/2]_2 \rightarrow 4s[3/2]_2^0, 4p[3/2]_2 \rightarrow 4s[3/2]_1^0,$<br>$4p[1/2]_2 \rightarrow 4s'[1/2]_1^0$                                                                                                                        | 3                           | 3.443                                       | -10.937 | 6.245  |
| 772.42              | $4p'[1/2]_1 \rightarrow 4s'[1/2]_0^0, 4p'[1/2]_1 \rightarrow 4s'[1/2]_1^0,$<br>$4p'[1/2]_1 \rightarrow 4s[3/2]_1^0, 4p'[1/2]_1 \rightarrow 4s[3/2]_2^0$                                                                                | 4                           | 3.522                                       | -14.994 | 18.992 |
| 811.53              | $4p[5/2]_3 \rightarrow 4s[3/2]_2^0$                                                                                                                                                                                                    | 1                           | 3.310                                       | -7.092  | -4.928 |

## Comparison of rate coefficients with the literature

### Taylor and Ali: JAP 64,89 (1988)

$$X(i, j) = \frac{4.3 \times 10^{-6} f(j, i) \exp[-E(j, i)/T_e]}{E(j, i) T_e^{1/2}} \Psi(j, i), \quad (11)$$

where  $E(j, i) = E(j) - E(i)$ ,  $i < j$ ,  $f(j, i)$  is the oscillator strength, and  $T_e$  is the electron temperature in units of eV. An effective Gaunt factor of 0.2 is used for ions,<sup>23,24</sup> while for neutrals

$$\Psi(j, i) = \left(1.0 + \frac{E(j, i)}{T_e}\right)^{-1} \left\{ \left(20.0 + \frac{E(j, i)}{T_e}\right)^{-1} + \ln \left[ 1.25 \left(1.0 + \frac{T_e}{E(j, i)}\right) \right] \right\}. \quad (12)$$

There is a typing error in Eqn 11 of the paper. The power of  $T_e$  in denominator will be 3/2

### Our case

$$k_{lu}(p_u) = 8.68 \times 10^{-8} c_{lu} Z_{\text{eff}}^{-3} f_{lu} \times \frac{u_a^{3/2}}{u_{lu}} \xi_a(u_{lu}, \beta_{lu}) \frac{cm^3}{s} \quad (6)$$

where the term  $Z_{\text{eff}}$  corresponds to the effective charge/atomic number ( $= 1$  for  $\text{Ar}^+$  ion),  $c_{lu}$  represents a constant ( $\cong 1$ ), and  $f_{lu}$  represents the absorption oscillator strength.<sup>54</sup> The other terms are  $u_a = 13.6 k_B T_e$  (eV),  $u_{lu} = (E_l - E_u)/k_B T_e$ , and  $\beta_{lu} = 1 + [(Z_{\text{eff}}-1)/(Z_{\text{eff}}+1)]$ . The function  $\xi_a(u_{lu}, \beta_{lu})$  can be determined<sup>53</sup> as

$$\xi_a(u_{lu}, \beta_{lu}) = \frac{e^{-u_a}}{1 + u_{lu}} \cdot \left\{ \frac{1}{20 + u_{lu}} + \ln \left[ 1.25 \times \left(1 + \frac{1}{u_{lu}}\right) \right] \right\} \quad (7)$$

We can further define the magnitude for rate coefficient  $k_{lu}(p_u)$  by electron-impact by a convenient and simpler expression with functional dependence on  $T_e$  using equations (6) and (7) as follows:

$$k_{lu}(p_u) = d_{lu}(p_u) \cdot e^{-E_u/k_B T_e} \frac{cm^3}{s} \quad (8)$$

# Rate coefficients: to obtain fitting parameters

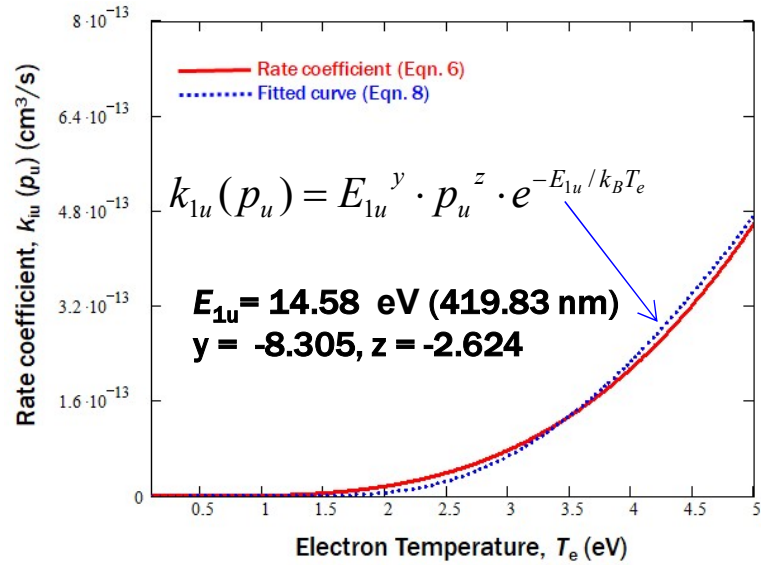

## Computed in MathCAD platform

Mathcad Professional - [Ar Te 419.83 nm]

File Edit View Insert Format Math Symbolics Window Help

Determination of rate coefficient

$C_{1u} := 1$  Constant  $Z_{eff} := 1$  Effective charge of plasma species of Ar ions

$F_{1u} := 2.26 \times 10^{-3}$  Oscillator strength of Ar line  $E_1 := 15.76$  Ground state energy of Ar

$ua(Te) := 13.6 \frac{k_B \cdot Te}{Q}$  a function of Te

$ulu(Eu, Te) := \left( \frac{E_1 - Eu}{Te} \right)$  a function of Te and Eu

$J_{11}(Eu, Te) := 8.69 \cdot 10^{-8} \cdot C_{1u} \cdot Z_{eff}^{-3} \cdot F_{1u} \cdot \frac{ua(Te)^{\frac{3}{2}}}{ulu(Eu, Te)}$

$J_{12}(Eu, Te) := \frac{1}{1 + ulu(Eu, Te)} \cdot e^{-ulu(Eu, Te)} \left[ \frac{1}{20 + ulu(Eu, Te)} + \ln \left[ 1.25 \left( 1 + \frac{1}{ulu(Eu, Te)} \right) \right] \right]$

$J_{13}(Eu, Te) := J_{11}(Eu, Te) \cdot J_{12}(Eu, Te)$   $J_{13}(14.58, 4) = 2.155 \times 10^{-13}$

$me := 9.1 \cdot 10^{-31} \text{ Kg}$   $e0 := 8.85 \cdot 10^{-12} \frac{\text{C}^2}{\text{m}}$

$Cq := 1.9 \cdot 10^{-19} \text{ Coulomb}$

$\lambda := 419.83 \cdot 10^{-9} \text{ m}$   $A_{ul} := 0.257 \cdot 10^7$

$F_{lu1} := \frac{A_{ul} \cdot me \cdot c \cdot e0 \cdot \lambda^2}{2 \cdot \pi \cdot Cq^2} \cdot \text{grat}$   $F_{lu1} = 1.608 \times 10^{-3}$

**Fitting function for the curve**

$pu := 3.395$   $y := -8.305$   $z := -2.624$

$J_{14}(Eu, Te) := Eu^y \cdot pu^z \cdot e^{-\frac{Eu}{Te}}$

$d_{1u} := 14.58^y \cdot pu^z$   $d_{1u} = 8.751 \times 10^{-12}$

Rate coefficient for each transition was computed

## Taylor and Ali: JAP 64,89 (1988)

There is a typing error in Eqn 11.  
The power of Te in denominator will be 3/2

$$X(i, j) = \frac{4.3 \times 10^{-6} f(j, i) \exp[-E(j, i)/T_e]}{E(j, i) T_e^{1/2}} \Psi(j, i), \quad (11)$$

### Determination of rate coefficient

C<sub>1u</sub> := 1    Constant    Z<sub>eff</sub> := 1    Effective charge of plasma species of Ar ions

F<sub>1u</sub> := 2.26 × 10<sup>-3</sup>    Oscillator strength of Ar line    E<sub>1</sub> := 15.76    Ground state energy of Ar

### Taylor & Ali: JAP

$$Si(Eu, Te) := \left(1 + \frac{Eu}{Te}\right)^{-1} \left[ \left(20 + \frac{Eu}{Te}\right)^{-1} + \ln \left[ 1.25 \left(1 + \frac{Te}{Eu}\right) \right] \right]$$

$$Ji3(Eu, Te) := 4.3 \cdot 10^{-6} \cdot \frac{F_{1u}}{Eu \cdot Te^{\frac{3}{2}}} \cdot e^{-\frac{Eu}{Te}} \cdot Si(Eu, Te)$$

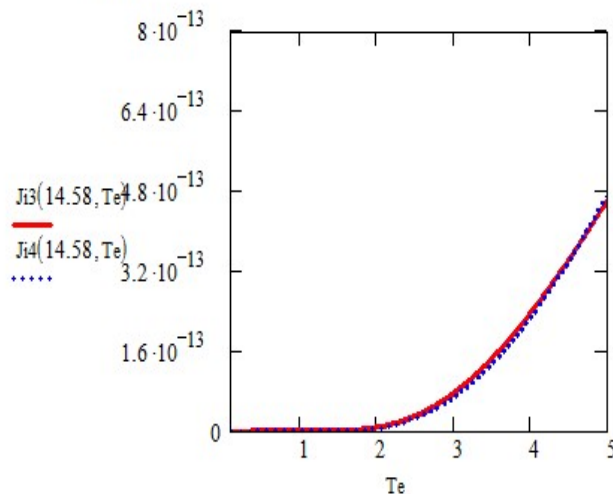

$$\lambda := 419.83 \cdot 10^{-9} \text{ m} \quad A_{ul} := 0.257 \cdot 10^7$$

$$F_{ul} := \frac{A_{ul} \cdot m_e \cdot c \cdot \epsilon_0 \cdot \lambda^2}{2 \cdot \pi \cdot C_q^2} \cdot \text{grat} \quad F_{ul} = 1.608 \times 10^{-3}$$

### Fitting function for the curve Ji4

pu := 3.395    y := -8.305    z := -2.624

$$Ji4(Eu, Te) := Eu^y \cdot pu^z \cdot e^{-\frac{Eu}{Te}}$$

dlu := 14.58<sup>y</sup> · pu<sup>z</sup>    dlu = 8.751 × 10<sup>-12</sup>

### Our case:

ua(Te) := 13.6 ·  $\frac{\text{kB} \cdot \text{Te}}{Q}$     a function of Te    ulu(Eu, Te) :=  $\left(\frac{E_1 - Eu}{Te}\right)$     a function of Te and Eu

$$Ji1(Eu, Te) := 8.69 \cdot 10^{-8} \cdot C_{1u} \cdot Z_{\text{eff}}^{-3} \cdot F_{1u} \cdot \frac{ua(Te)^{\frac{3}{2}}}{ulu(Eu, Te)} \cdot 1$$

$$Ji2(Eu, Te) := \frac{1}{1 + ulu(Eu, Te)} \cdot e^{-ulu(Eu, Te)} \cdot \left[ \frac{1}{20 + ulu(Eu, Te)} + \ln \left[ 1.25 \cdot \left(1 + \frac{1}{ulu(Eu, Te)}\right) \right] \right]$$

Ji5(Eu, Te) := Ji1(Eu, Te) · Ji2(Eu, Te)    Ji5(14.58, 4) = 2.155 × 10<sup>-13</sup>

## Our case

$$k_{lu}(p_u) = 8.68 \times 10^{-8} c_{lu} Z_{eff}^{-3} f_{lu} \times \frac{u_a^{3/2}}{u_{lu}} \zeta_a(u_{lu}, \beta_{lu}) \frac{cm^3}{s} \quad (6)$$

## Our case:

$$u_a(Te) := 13.6 \frac{kB \cdot Te}{Q} \quad \text{a function of Te} \quad u_{lu}(Eu, Te) := \left( \frac{E1 - Eu}{Te} \right) \quad \text{a function of Te and Eu}$$

$$J_{i1}(Eu, Te) := 8.69 \cdot 10^{-8} \cdot C_{lu} \cdot Z_{eff}^{-3} \cdot F_{lu} \cdot \frac{u_a(Te)^{\frac{3}{2}}}{u_{lu}(Eu, Te)} \cdot 1$$

$$J_{i2}(Eu, Te) := \frac{1}{1 + u_{lu}(Eu, Te)} \cdot e^{-u_{lu}(Eu, Te)} \cdot \left[ \frac{1}{20 + u_{lu}(Eu, Te)} + \ln \left[ 1.25 \cdot \left( 1 + \frac{1}{u_{lu}(Eu, Te)} \right) \right] \right]$$

$$J_{i5}(Eu, Te) := J_{i1}(Eu, Te) \cdot J_{i2}(Eu, Te) \quad J_{i5}(14.58, 4) = 2.155 \times 10^{-13}$$

Our case  $J_{i5}$   
Taylor-Ali case  $J_{i3}$

$$\begin{aligned} & \text{---} J_{i3}(14.58, Te) \quad 4.8 \cdot 10^{-13} \\ & \text{.....} J_{i5}(14.58, Te) \quad 3.2 \cdot 10^{-13} \end{aligned}$$

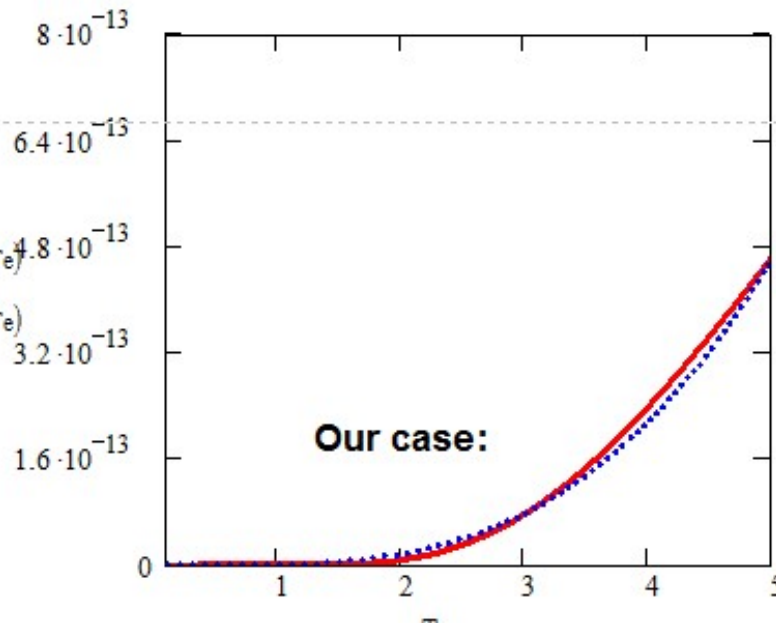

+

Typical OES spectra during glow (pulse on) at  $t = 1 \mu\text{s}$  and after glow (pulse off) at  $t = 63 \mu\text{s}$

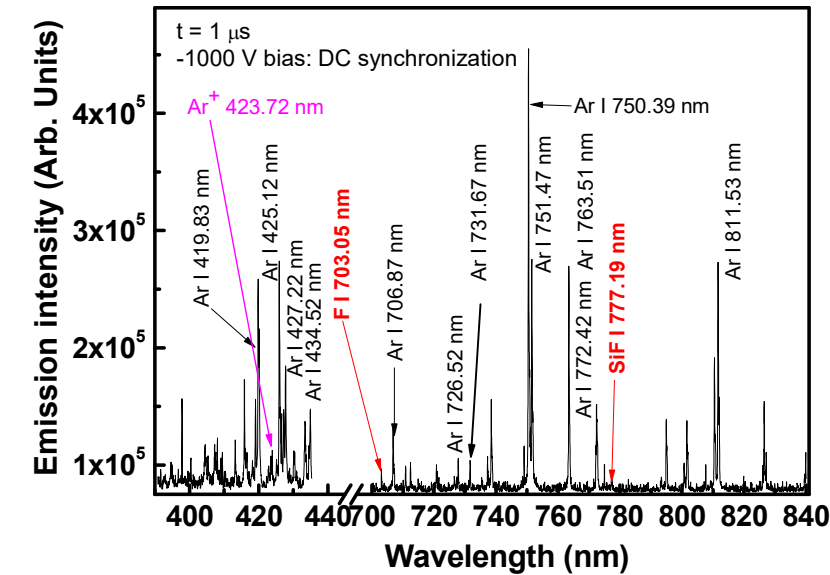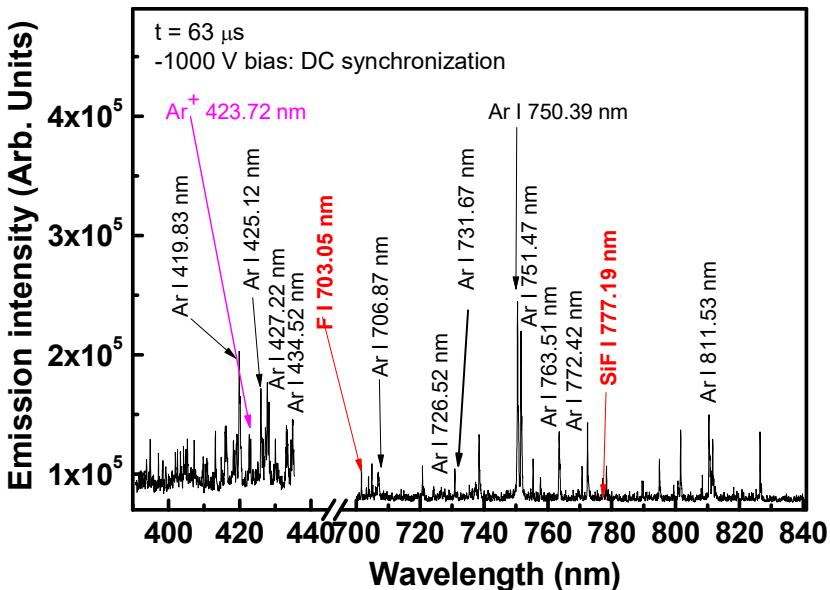

| $\lambda$ (Table I)<br>Used for the<br>calculation | $\lambda$<br>(measured) | I(nm)<br>At $t = 1 \mu\text{s}$ | I(nm)<br>At $t = 63 \mu\text{s}$ |
|----------------------------------------------------|-------------------------|---------------------------------|----------------------------------|
| 419.83                                             | 419.88041               | 238930                          | 203036                           |
| 425.12                                             | 425.14201               | 104705                          | 108210                           |
| 427.22                                             | 427.22953               | 146390                          | 138939                           |
| 434.52                                             | 434.53685               | 112450                          | 102979                           |
| 706.87                                             | 706.85925               | 123008                          | 100958                           |
| 726.52                                             | 726.50789               | 86898.1                         | 84696.4                          |
| 731.67                                             | 731.67283               | 103970                          | 84518.8                          |
| 750.39                                             | 750.39233               | 292102                          | 151900                           |
| 751.47                                             | 751.48544               | 224218                          | 151487                           |
| 763.51                                             | 763.50964               | 269491                          | 131890                           |
| 772.42                                             | 772.41849               | 150203                          | 141566                           |
| 811.53                                             | 811.52448               | 155569                          | 95117                            |

# Rate coefficients: to obtain fitting parameters

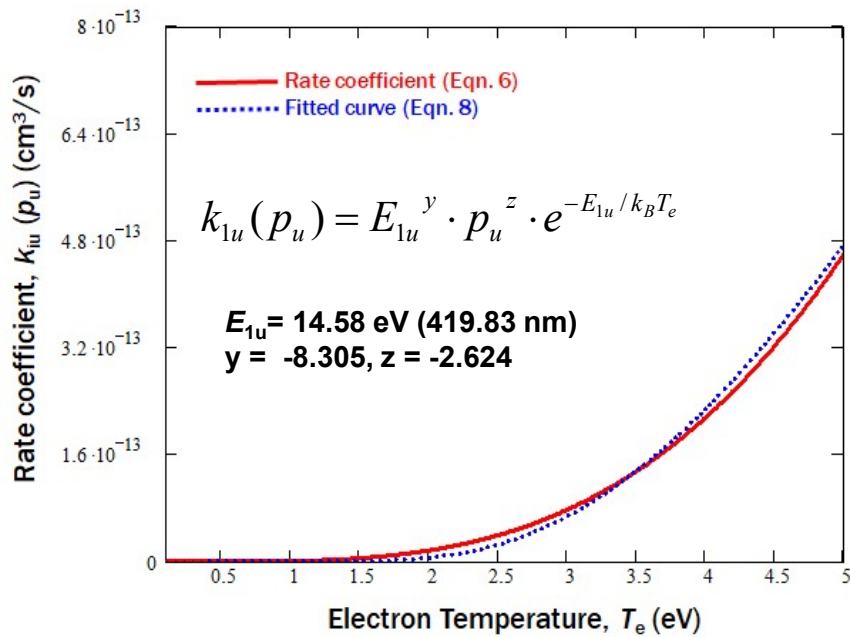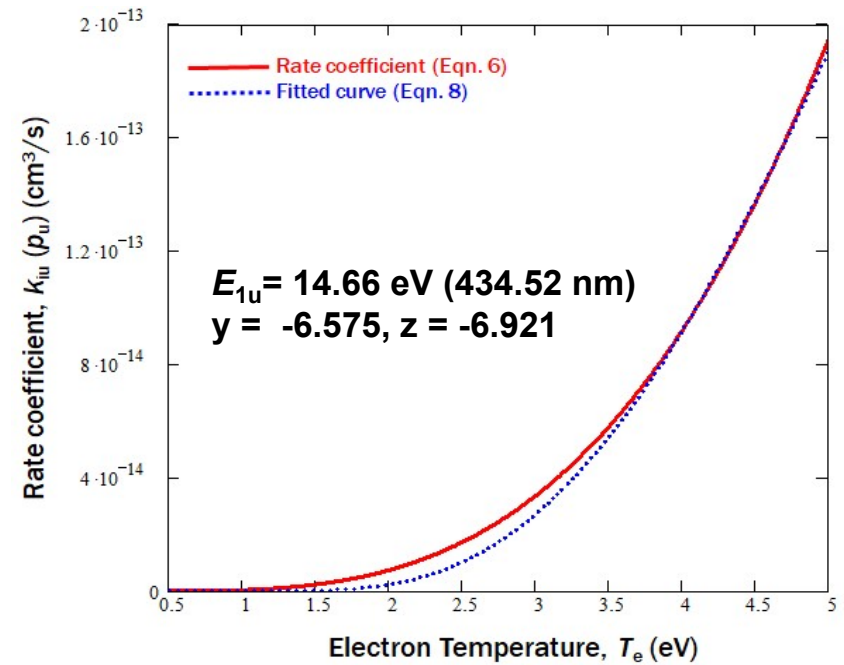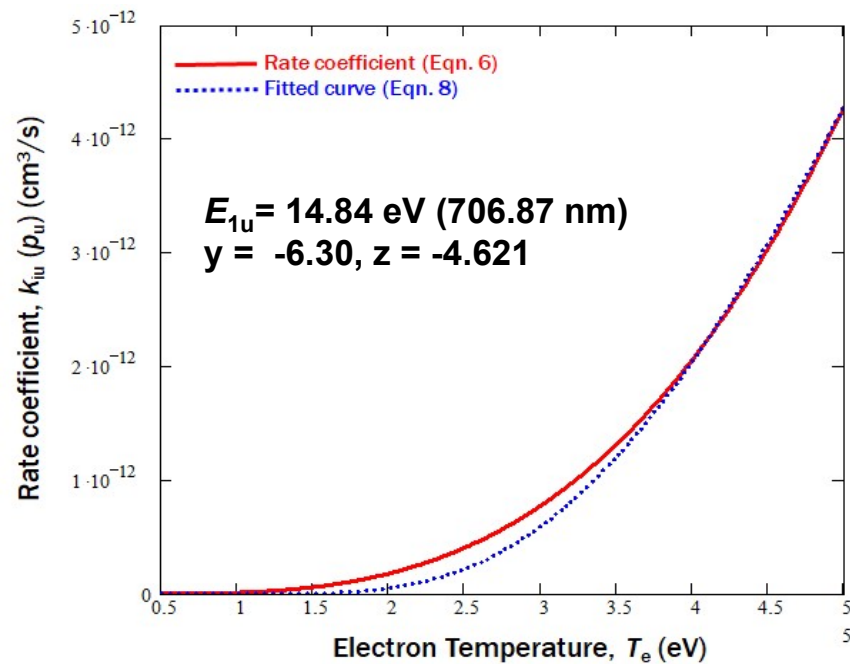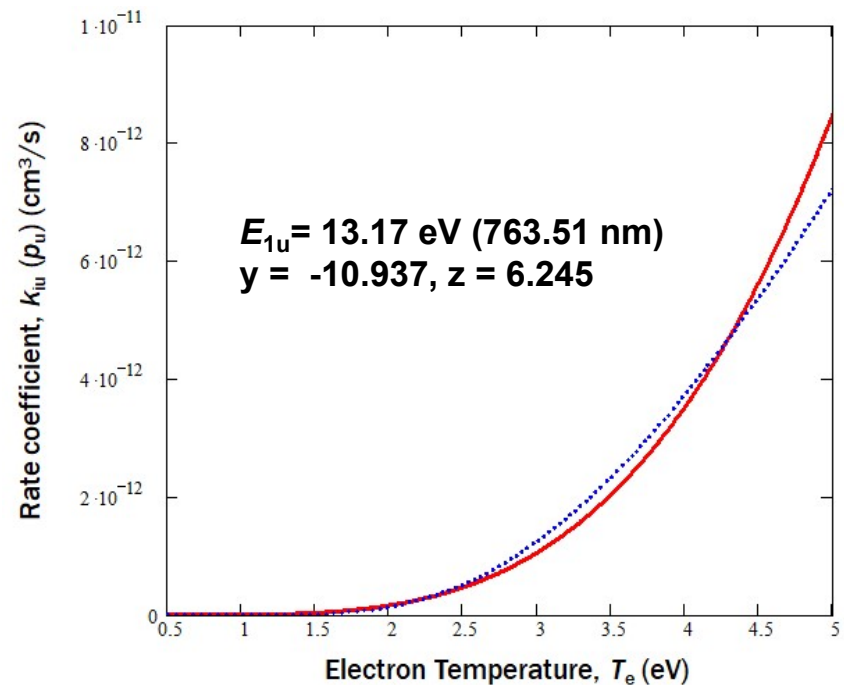



# Rate coefficients: to obtain fitting parameters

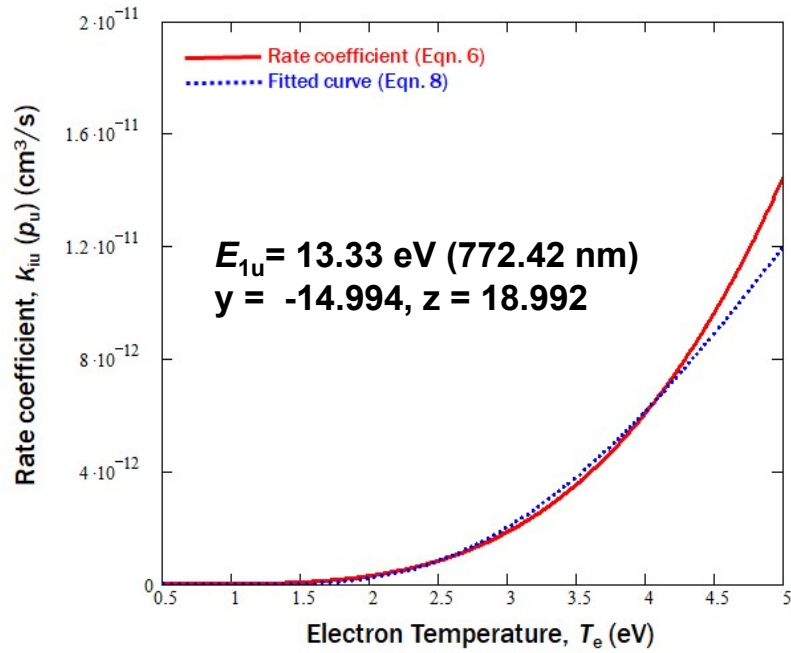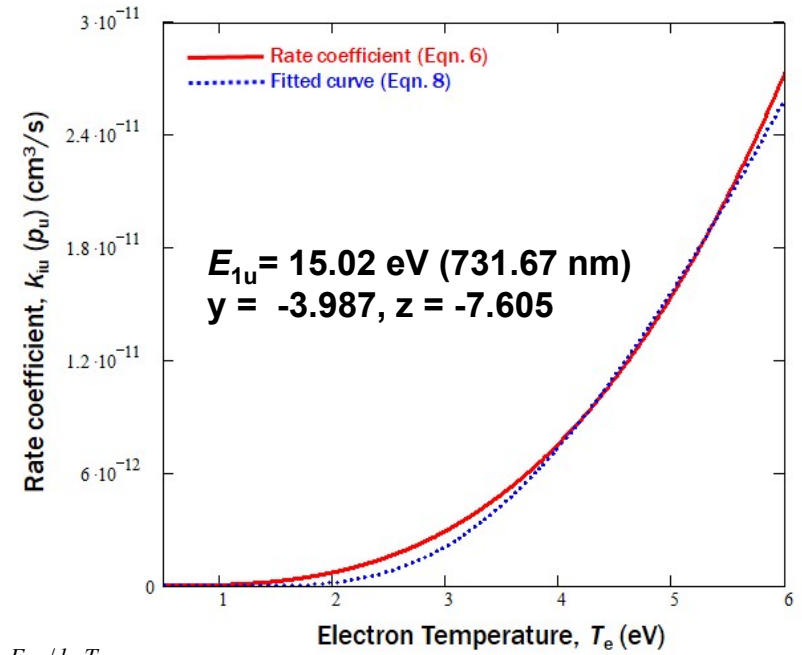

$$k_{1u}(p_u) = E_{1u}^y \cdot p_u^z \cdot e^{-E_{1u}/k_B T_e}$$

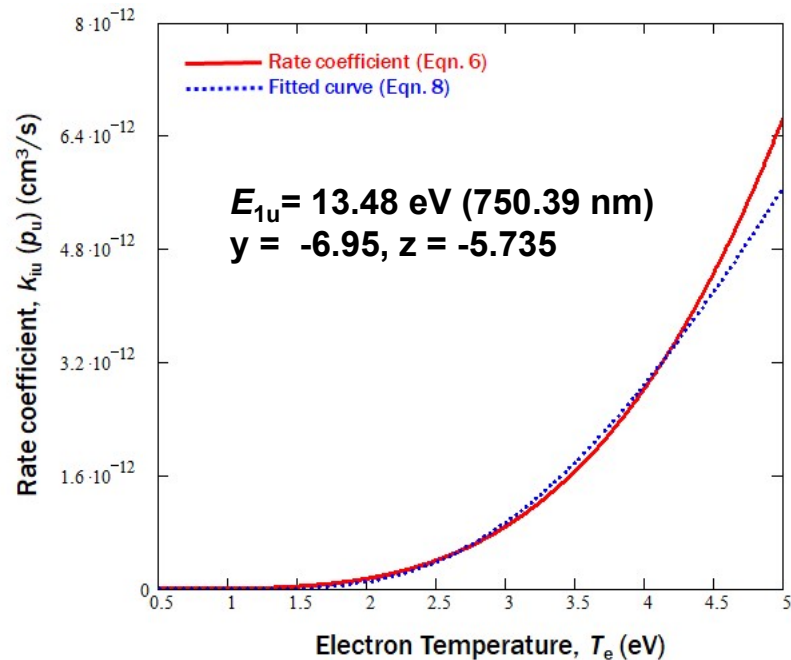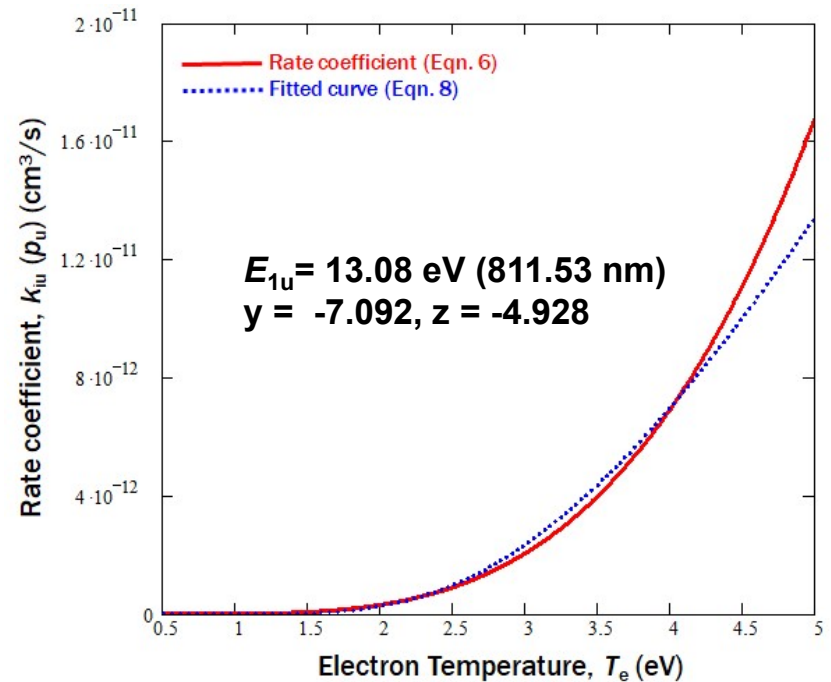

# **The parameter of corona model and validity of corona approximation**

Typical OES spectrum during glow (pulse on) at  $t = 1 \mu\text{s}$  and after glow (pulse off) at  $t = 63 \mu\text{s}$



| $\lambda$ (Table I)<br>Used for the<br>calculation | $\lambda$<br>(measured) | I(nm)<br>At $t = 1\mu\text{s}$ | I(nm)<br>At $t = 63\mu\text{s}$ |
|----------------------------------------------------|-------------------------|--------------------------------|---------------------------------|
| 419.83                                             | 419.88041               | 238930                         | 203036                          |
| 425.12                                             | 425.14201               | 104705                         | 108210                          |
| 427.22                                             | 427.22953               | 146390                         | 138939                          |
| 434.52                                             | 434.53685               | 112450                         | 102979                          |
| 706.87                                             | 706.85925               | 123008                         | 100958                          |
| 726.52                                             | 726.50789               | 86898.1                        | 84696.4                         |
| 731.67                                             | 731.67283               | 103970                         | 84518.8                         |
| 750.39                                             | 750.39233               | 292102                         | 151900                          |
| 751.47                                             | 751.48544               | 224218                         | 151487                          |
| 763.51                                             | 763.50964               | 269491                         | 131890                          |
| 772.42                                             | 772.41849               | 150203                         | 141566                          |
| 811.53                                             | 811.52448               | 155569                         | 95117                           |

# Corona factor (a) of Eqn 12

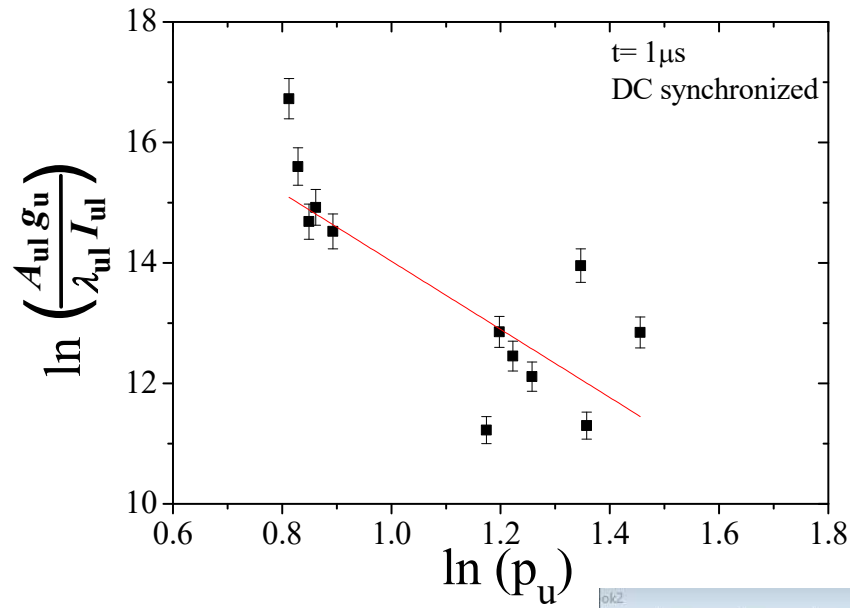

$$\ln\left(\frac{g_u \cdot A_{ul}}{I_{ul} \cdot \lambda_{ul}}\right) = -5.6 \cdot \ln(p_u) + 19.6$$

|          | X(X)  | L1(xEr±) | A(Y)          | B(Y)      | C(Y)   | D(Y) | E(Y)     | F(Y)     | G(Y)     | L(yEr±) | M1(xEr±) | H(Y)      | I(Y) | J(Y) | K(Y)  |         |
|----------|-------|----------|---------------|-----------|--------|------|----------|----------|----------|---------|----------|-----------|------|------|-------|---------|
| g Name   | Eu    |          | Wavelength    | Intensity | A      | g    | Sigma A  | dpu      |          |         |          |           |      |      | pu    | ln(pu)  |
| Units    | eV    |          | nm            |           |        |      |          |          |          |         |          |           |      |      |       |         |
| Comments |       |          |               |           |        |      |          |          |          |         |          |           |      |      |       |         |
| 1        | 14.58 | 0.24907  | 419.8804<br>1 | 238930    | 2.57E6 | 1    | 3.75E6   | #####    | 12.45362 | 0.24907 | -0.84437 | -28.1455  |      |      | 3.395 | 1.2223  |
| 2        | 14.46 | 0.22445  | 425.1420<br>1 | 104705    | 111000 | 3    | 848800   | #####    | 11.22267 | 0.22445 | -0.95185 | -31.72824 |      |      | 3.234 | 1.17372 |
| 3        | 14.52 | 0.25708  | 427.2295<br>3 | 146390    | 797000 | 3    | 1.1797E6 | #####    | 12.85397 | 0.25708 | -0.83598 | -27.86596 |      |      | 3.312 | 1.19755 |
| 4        | 14.66 | 0.24227  | 434.5368<br>5 | 112450    | 297000 | 3    | 324000   | #####    | 12.11365 | 0.24227 | -0.8409  | -28.02996 |      |      | 3.516 | 1.25732 |
| 5        | 14.84 | 0.27911  | 706.8592<br>5 | 123008    | 2E6    | 5    | 5.191E6  | #####    | 13.95536 | 0.27911 | -0.78963 | -26.32114 |      |      | 3.845 | 1.34677 |
| 6        | 14.86 | 0.22599  | 726.5078<br>9 | 86898.1   | 170000 | 3    | 173000   | #####    | 11.29952 | 0.22599 | -0.71115 | -23.70488 |      |      | 3.887 | 1.35764 |
| 7        | 15.02 | 0.25688  | 731.6728<br>3 | 103970    | 960000 | 3    | 4.559E6  | 3.17E-10 | 12.84421 | 0.25688 | -0.76377 | -25.45914 |      |      | 4.287 | 1.45559 |
| 8        | 13.48 | 0.29047  | 750.3923<br>3 | 292102    | 4.45E7 | 1    | 4.4736E7 | #####    | 14.52364 | 0.29047 | -0.78874 | -26.29131 |      |      | 2.442 | 0.89282 |
| 9        | 13.27 | 0.2937   | 751.4854<br>4 | 224218    | 4.02E6 |      |          |          |          |         |          |           |      |      |       |         |
| 10       | 13.17 | 0.31201  | 763.5096<br>4 | 269491    | 2.45E6 |      |          |          |          |         |          |           |      |      |       |         |
| 11       | 13.33 | 0.29845  | 772.4184<br>9 | 150203    | 1.17E6 |      |          |          |          |         |          |           |      |      |       |         |
| 12       | 13.08 | 0.33451  | 811.5244<br>8 | 155569    | 3.31E6 |      |          |          |          |         |          |           |      |      |       |         |
| 13       |       |          |               |           |        |      |          |          |          |         |          |           |      |      |       |         |
| 14       |       |          |               |           |        |      |          |          |          |         |          |           |      |      |       |         |
| 15       |       |          |               |           |        |      |          |          |          |         |          |           |      |      |       |         |
| 16       |       |          |               |           |        |      |          |          |          |         |          |           |      |      |       |         |
| 17       |       |          |               |           |        |      |          |          |          |         |          |           |      |      |       |         |
| 18       |       |          |               |           |        |      |          |          |          |         |          |           |      |      |       |         |
| 19       |       |          |               |           |        |      |          |          |          |         |          |           |      |      |       |         |
| 20       |       |          |               |           |        |      |          |          |          |         |          |           |      |      |       |         |

Set Values - [Book2]Sheet1!Col(G)

Formula wcol(1) Col(A) F(x) Variables

Row (i): From <auto> To <auto>

Col(G) =

$\ln((\text{col}(D) * \text{col}(C)) / (\text{col}(B) * 1E-7 * \text{col}(A)))$

Recalculate None

Apply Cancel OK

# Relative population densities as a function of their effective principal quantum number $p_u$

Verification of corona balance  $\frac{N_u(p_u)}{g_u(p_u)} \propto p_u^{-a}$

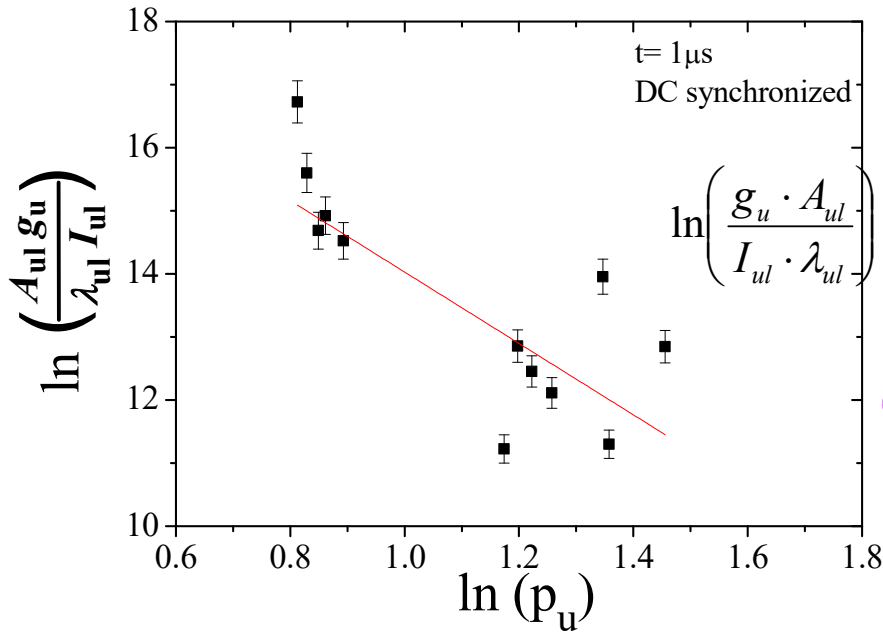

$a \sim 5.6$

## Corona balance formalism

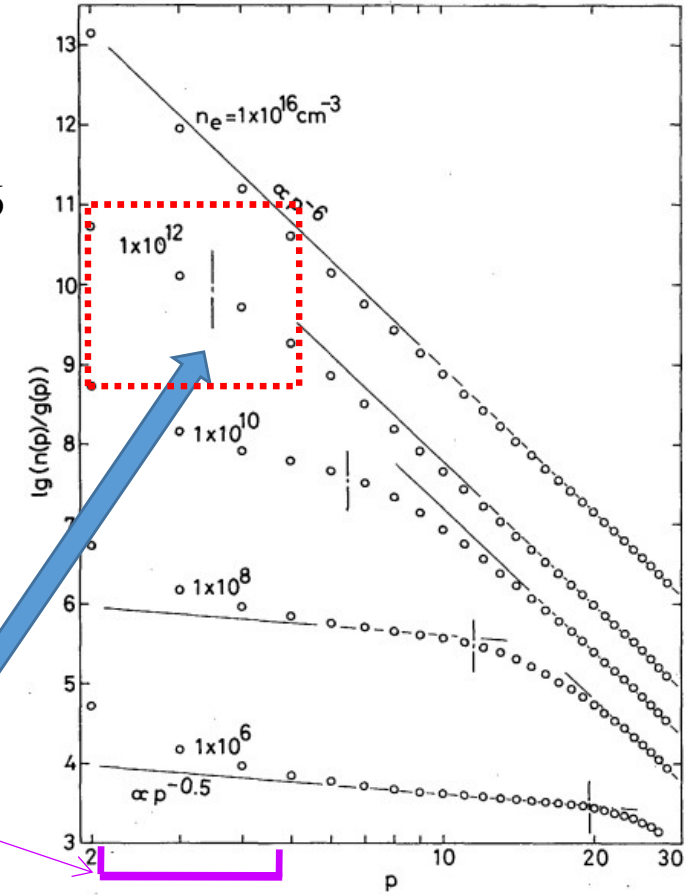

$2.253 \leq p_u \leq 4.287$  → Well within the corona balance

$4 \leq a \leq 6$

J. Phys. Soc. Japan 47, 273 (1979).

Our experiments

- The higher value of  $a \sim 5.6$  in our experiment suggests that  $n_e \sim 10^{11} \sim 10^{13} \text{ cm}^{-3}$

# Relative population densities as a function of their effective principal quantum number $p_u$

Verification of corona balance  $\frac{N_u(p_u)}{g_u(p_u)} \propto p_u^{-a}$

DC synchronous condition

$t = 1 \mu\text{s}$

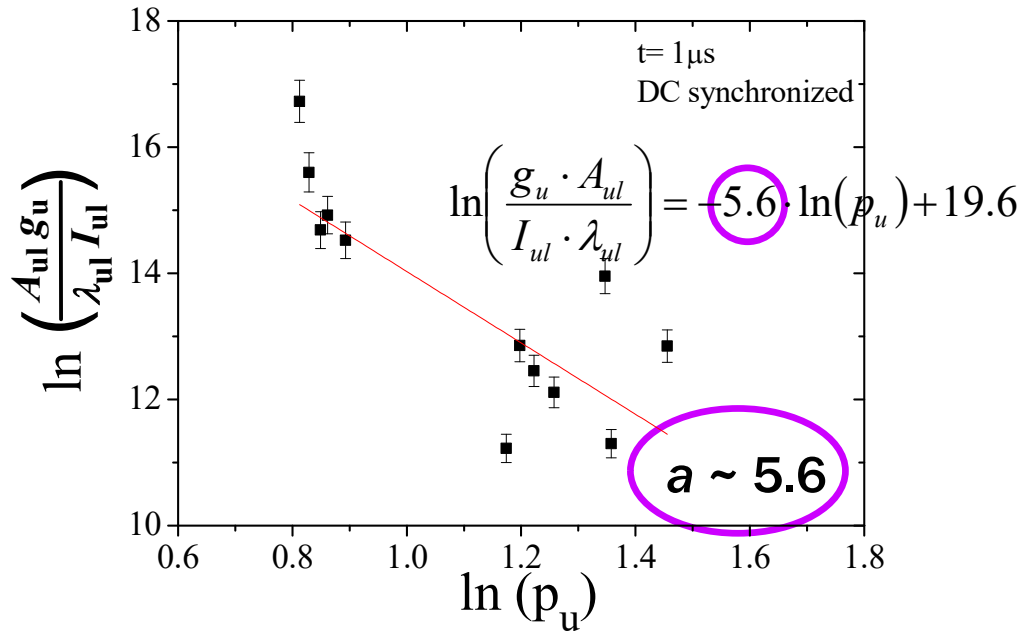

$t = 61 \mu\text{s}$

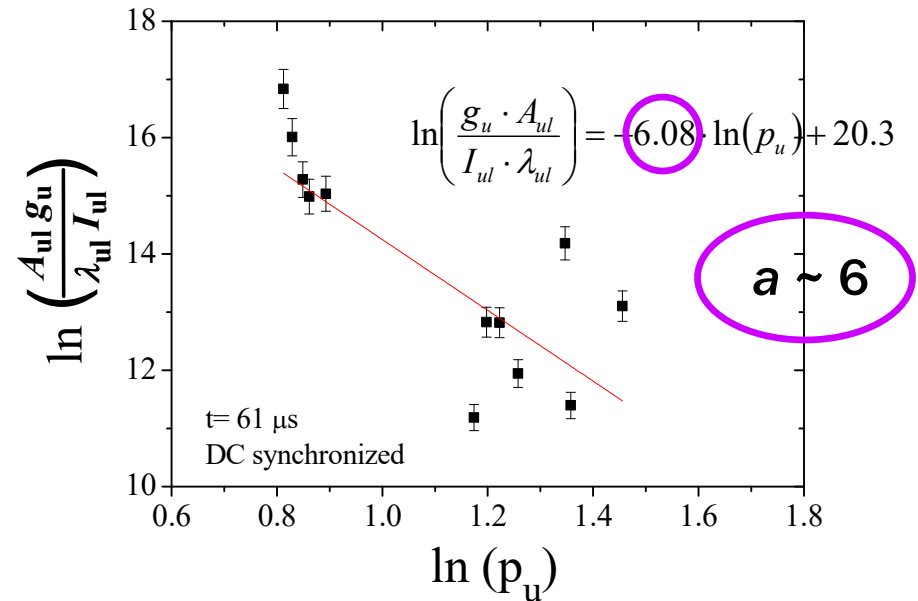

$2.253 \leq p_u \leq 4.287$   $\rightarrow$  Well within the corona balance

# Experimental results and discussion

## 1. Boltzmann Plot: Excitation temperature: $T_{ex}$

$$\ln\left(\frac{g_u \cdot A_{ul}}{I_{ul} \cdot \lambda_{ul}}\right) = \frac{E_u}{k_B T_{ex}} + C_1 \quad \Rightarrow \quad E_u = k_B T_{ex} \cdot \ln\left(\frac{g_u \cdot A_{ul}}{I_{ul} \cdot \lambda_{ul}}\right) + \text{constant}$$

## 2. Modified Boltzmann equation: Electron temperature: $T_e$

$$\ln\left\{\frac{A_{ul} d_{1u}(p_u)}{\lambda_{ul} I_{ul} \sum_{u>l} A_{ul}}\right\} = \frac{E_{1u}}{k_B T_e} + C_2 \quad \Rightarrow \quad E_{1u} = k_B T_e \cdot \ln\left\{\frac{A_{ul} d_{1u}(p_u)}{\lambda_{ul} I_{ul} \sum_{u>l} A_{ul}}\right\} + \text{constant}$$

## 3. Variation of $T_{ex}$ and $T_e$ with RF pulse condition

# OES SPECTRUM: Examples in DC synchronized condition

Typical OES spectrum during glow (pulse on) at  $t = 1 \mu\text{s}$  and after glow (pulse off) at  $t = 63 \mu\text{s}$

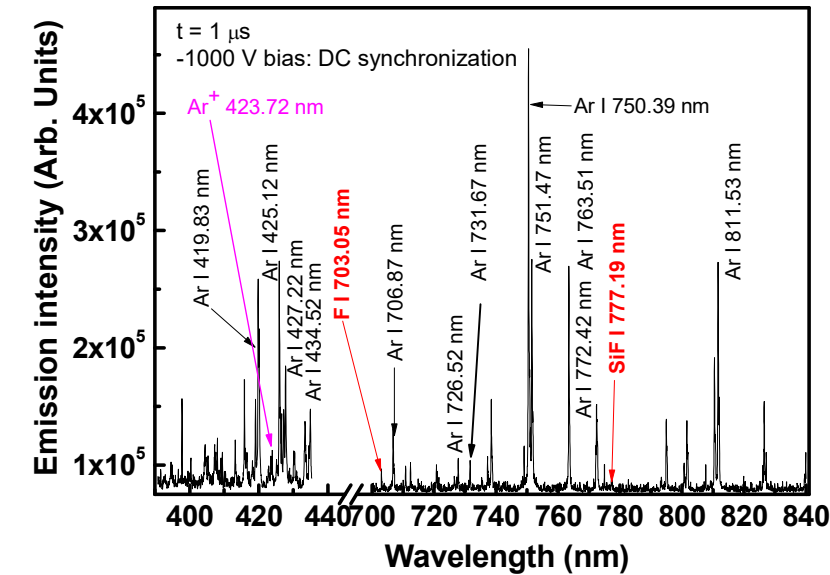

| $\lambda$ (Table I)<br>Used for the<br>calculation | $\lambda$<br>(measured) | I(nm)<br>At $t = 1 \mu\text{s}$ | I(nm)<br>At $t = 63 \mu\text{s}$ |
|----------------------------------------------------|-------------------------|---------------------------------|----------------------------------|
| 419.83                                             | 419.88041               | 238930                          | 203036                           |
| 425.12                                             | 425.14201               | 104705                          | 108210                           |
| 427.22                                             | 427.22953               | 146390                          | 138939                           |
| 434.52                                             | 434.53685               | 112450                          | 102979                           |
| 706.87                                             | 706.85925               | 123008                          | 100958                           |
| 726.52                                             | 726.50789               | 86898.1                         | 84696.4                          |
| 731.67                                             | 731.67283               | 103970                          | 84518.8                          |
| 750.39                                             | 750.39233               | 292102                          | 151900                           |
| 751.47                                             | 751.48544               | 224218                          | 151487                           |
| 763.51                                             | 763.50964               | 269491                          | 131890                           |
| 772.42                                             | 772.41849               | 150203                          | 141566                           |
| 811.53                                             | 811.52448               | 155569                          | 95117                            |



# $T_{ex}$ estimation using modified Boltzmann equation

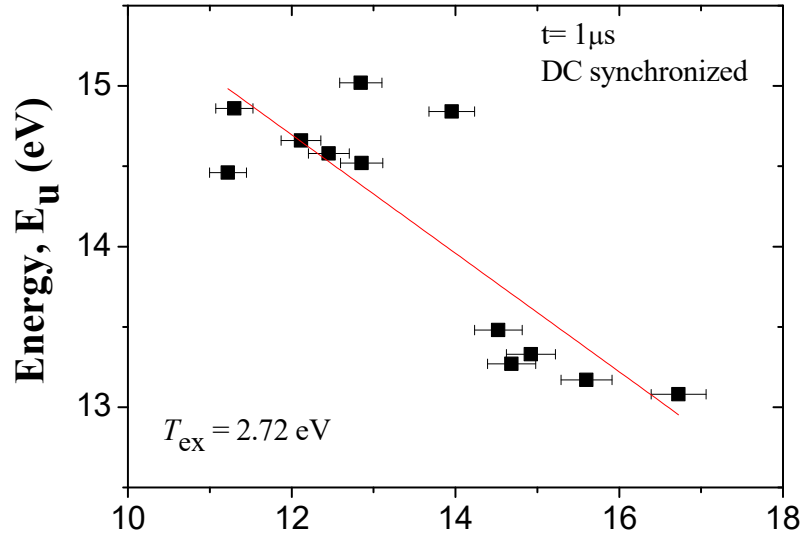

Step 1

Calculation method (as a proof)

| lg Name | Eu    | L10(Ers) | A(Y)          | B(Y)      | C(Y)   | D(Y) | E(Y)     | F(Y)     | G(Y)     | H(Y)    | J(Y)     | K(Y)      |
|---------|-------|----------|---------------|-----------|--------|------|----------|----------|----------|---------|----------|-----------|
| Units   | ev    |          | Wavelength nm | Intensity | A      | g    | Sigma A  | dpu      |          |         | pu       | ln(pu)    |
| 1       | 14.58 | 0.24907  | 419.8804      | 238930    | 2.57E6 | 1    | 3.75E6   | #####    | 12.45362 | 0.24907 | -8.44437 | -28.1455  |
| 2       | 14.46 | 0.22445  | 425.1420      | 104705    | 111000 | 3    | 848800   | #####    | 11.22267 | 0.22445 | -0.95185 | -31.72824 |
| 3       | 14.52 | 0.25708  | 427.2295      | 146390    | 797000 | 3    | 1.1797E6 | #####    | 12.85397 | 0.25708 | -0.83598 | -27.86596 |
| 4       | 14.66 | 0.24227  | 434.5368      | 112450    | 297000 | 3    | 324000   | #####    | 12.11365 | 0.24227 | -0.6409  | -28.02996 |
| 5       | 14.84 | 0.27911  | 706.8592      | 123008    | 2E6    | 5    | 5.191E6  | #####    | 13.95536 | 0.27911 | -0.78963 | -26.32114 |
| 6       | 14.86 | 0.22599  | 726.5078      | 86898.1   | 170000 | 3    | 173000   | #####    | 11.29952 | 0.22599 | -0.71115 | -23.70488 |
| 7       | 15.02 | 0.25688  | 731.6728      | 103970    | 960000 | 3    | 4.559E6  | 3.17E-10 | 12.84421 | 0.25688 | -0.76377 | -25.45914 |
| 8       | 13.48 | 0.29047  | 750.3923      | 292102    | 4.45E7 | 1    | 4.4736E7 | #####    | 14.52364 | 0.29047 | -0.78874 | -26.29131 |
| 9       | 13.27 | 0.2937   | 751.4854      | 224218    | 4.02E7 | 1    | 4.104E7  | #####    | 14.88505 | 0.2937  | -0.79091 | -26.36368 |
| 10      | 13.17 | 0.31201  | 763.5096      | 269491    | 2.45E7 | 5    | 3.443E7  | #####    | 15.00032 | 0.31201 | -0.79144 | -26.38144 |
| 11      | 13.33 | 0.29845  | 772.4184      | 150203    | 1.17E7 | 3    | 3.522E7  | #####    | 14.92254 | 0.29845 | -0.78999 | -26.03209 |
| 12      | 13.08 | 0.33451  | 811.5244      | 155569    | 3.31E7 | 7    | 3.31E7   | #####    | 16.72529 | 0.33451 | -0.74318 | -24.7726  |

Step 2

| lg Name | Eu    | L10(Ers) | A(Y)          | B(Y)      | C(Y)   | D(Y) | E(Y)     | F(Y)     | G(Y)     | L0(Ers) | M10(Ers) | H(Y)      | I(Y) | J(Y)  | K(Y)    |
|---------|-------|----------|---------------|-----------|--------|------|----------|----------|----------|---------|----------|-----------|------|-------|---------|
| Units   | ev    |          | Wavelength nm | Intensity | A      | g    | Sigma A  | dpu      |          |         |          |           |      | pu    | ln(pu)  |
| 1       | 14.58 | 0.24907  | 419.8804      | 238930    | 2.57E6 | 1    | 3.75E6   | #####    | 12.45362 | 0.24907 | -0.84437 | -28.1455  |      | 3.395 | 1.2223  |
| 2       | 14.46 | 0.22445  | 425.1420      | 104705    | 111000 | 3    | 848800   | #####    | 11.22267 | 0.22445 | -0.95185 | -31.72824 |      | 3.234 | 1.17372 |
| 3       | 14.52 | 0.25708  | 427.2295      | 146390    | 797000 | 3    | 1.1797E6 | #####    | 12.85397 | 0.25708 | -0.83598 | -27.86596 |      | 3.312 | 1.19755 |
| 4       | 14.66 | 0.24227  | 434.5368      | 112450    | 297000 | 3    | 324000   | #####    | 12.11365 | 0.24227 | -0.6409  | -28.02996 |      | 3.516 | 1.25732 |
| 5       | 14.84 | 0.27911  | 706.8592      | 123008    | 2E6    | 5    | 5.191E6  | #####    | 13.95536 | 0.27911 | -0.78963 | -26.32114 |      | 3.845 | 1.34677 |
| 6       | 14.86 | 0.22599  | 726.5078      | 86898.1   | 170000 | 3    | 173000   | #####    | 11.29952 | 0.22599 | -0.71115 | -23.70488 |      | 3.887 | 1.35764 |
| 7       | 15.02 | 0.25688  | 731.6728      | 103970    | 960000 | 3    | 4.559E6  | 3.17E-10 | 12.84421 | 0.25688 | -0.76377 | -25.45914 |      | 4.287 | 1.45559 |
| 8       | 13.48 | 0.29047  | 750.3923      | 292102    | 4.45E7 | 1    | 4.4736E7 | #####    | 14.52364 | 0.29047 | -0.78874 | -26.29131 |      | 2.442 | 0.89282 |
| 9       | 13.27 | 0.2937   | 751.4854      | 224218    | 4.02E7 | 1    | 4.104E7  | #####    | 14.88505 | 0.2937  | -0.79091 | -26.36368 |      | 2.337 | 0.84887 |
| 10      | 13.17 | 0.31201  | 763.5096      | 269491    | 2.45E7 | 5    | 3.443E7  | #####    | 15.00032 | 0.31201 | -0.79144 | -26.38144 |      | 2.291 | 0.82899 |
| 11      | 13.33 | 0.29845  | 772.4184      | 150203    | 1.17E7 | 3    | 3.522E7  | #####    | 14.92254 | 0.29845 | -0.78999 | -26.03209 |      | 2.366 | 0.8612  |
| 12      | 13.08 | 0.33451  | 811.5244      | 155569    | 3.31E7 | 7    | 3.31E7   | #####    | 16.72529 | 0.33451 | -0.74318 | -24.7726  |      | 2.253 | 0.81226 |

Step 3

| lg Name | Eu    | L10(Ers) | A(Y)          | B(Y)      | C(Y)   | D(Y) | E(Y)     | F(Y)     | G(Y)     | L0(Ers) | M10(Ers) | H(Y)      | I(Y) | J(Y)  | K(Y)    |
|---------|-------|----------|---------------|-----------|--------|------|----------|----------|----------|---------|----------|-----------|------|-------|---------|
| Units   | ev    |          | Wavelength nm | Intensity | A      | g    | Sigma A  | dpu      |          |         |          |           |      | pu    | ln(pu)  |
| 1       | 14.58 | 0.24907  | 419.8804      | 238930    | 2.57E6 | 1    | 3.75E6   | #####    | 12.45362 | 0.24907 | -0.84437 | -28.1455  |      | 3.395 | 1.2223  |
| 2       | 14.46 | 0.22445  | 425.1420      | 104705    | 111000 | 3    | 848800   | #####    | 11.22267 | 0.22445 | -0.95185 | -31.72824 |      | 3.234 | 1.17372 |
| 3       | 14.52 | 0.25708  | 427.2295      | 146390    | 797000 | 3    | 1.1797E6 | #####    | 12.85397 | 0.25708 | -0.83598 | -27.86596 |      | 3.312 | 1.19755 |
| 4       | 14.66 | 0.24227  | 434.5368      | 112450    | 297000 | 3    | 324000   | #####    | 12.11365 | 0.24227 | -0.6409  | -28.02996 |      | 3.516 | 1.25732 |
| 5       | 14.84 | 0.27911  | 706.8592      | 123008    | 2E6    | 5    | 5.191E6  | #####    | 13.95536 | 0.27911 | -0.78963 | -26.32114 |      | 3.845 | 1.34677 |
| 6       | 14.86 | 0.22599  | 726.5078      | 86898.1   | 170000 | 3    | 173000   | #####    | 11.29952 | 0.22599 | -0.71115 | -23.70488 |      | 3.887 | 1.35764 |
| 7       | 15.02 | 0.25688  | 731.6728      | 103970    | 960000 | 3    | 4.559E6  | 3.17E-10 | 12.84421 | 0.25688 | -0.76377 | -25.45914 |      | 4.287 | 1.45559 |
| 8       | 13.48 | 0.29047  | 750.3923      | 292102    | 4.45E7 | 1    | 4.4736E7 | #####    | 14.52364 | 0.29047 | -0.78874 | -26.29131 |      | 2.442 | 0.89282 |
| 9       | 13.27 | 0.2937   | 751.4854      | 224218    | 4.02E7 | 1    | 4.104E7  | #####    | 14.88505 | 0.2937  | -0.79091 | -26.36368 |      | 2.337 | 0.84887 |
| 10      | 13.17 | 0.31201  | 763.5096      | 269491    | 2.45E7 | 5    | 3.443E7  | #####    | 15.00032 | 0.31201 | -0.79144 | -26.38144 |      | 2.291 | 0.82899 |
| 11      | 13.33 | 0.29845  | 772.4184      | 150203    | 1.17E7 | 3    | 3.522E7  | #####    | 14.92254 | 0.29845 | -0.78999 | -26.03209 |      | 2.366 | 0.8612  |
| 12      | 13.08 | 0.33451  | 811.5244      | 155569    | 3.31E7 | 7    | 3.31E7   | #####    | 16.72529 | 0.33451 | -0.74318 | -24.7726  |      | 2.253 | 0.81226 |

Step 4

$$\ln \left( \frac{A_{ul} g_u}{\lambda_{ul} I_{ul}} \right)$$

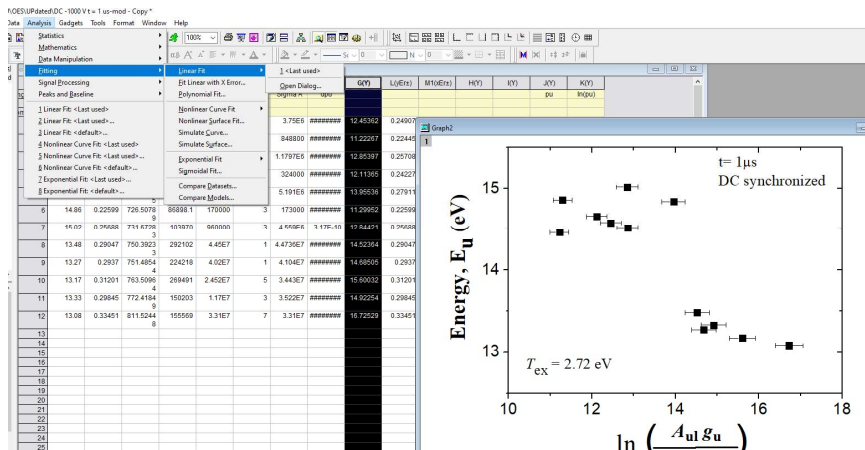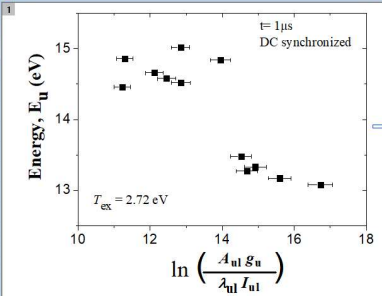

# T<sub>e</sub> estimation from Eqn. 11

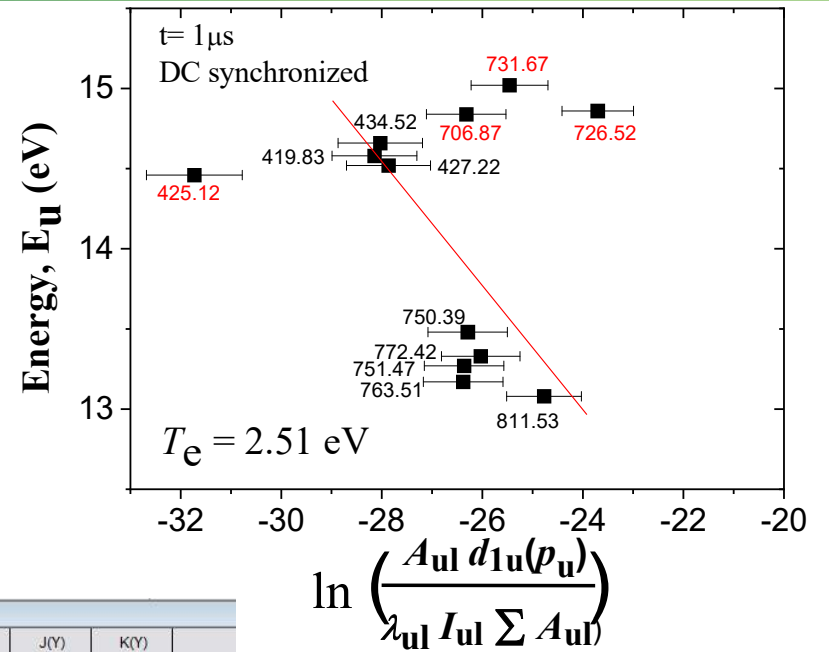

| ng Name | Eu    | L1(xEr±) | A(Y)             | B(Y)      | C(Y)    | D(Y) | E(Y)     | F(Y)     | G(Y)     | L(yEr±) | M1(xEr±) | H(Y)      | I(Y) | J(Y)  | K(Y)    |
|---------|-------|----------|------------------|-----------|---------|------|----------|----------|----------|---------|----------|-----------|------|-------|---------|
| Units   | eV    |          | Wavelength<br>nm | Intensity | A       | g    | Sigma A  | dpu      |          |         |          |           |      | pu    | ln(pu)  |
| 1       | 14.58 | 0.24907  | 419.8804<br>1    | 238930    | 2.57E6  | 1    | 3.75E6   | #####    | 12.45362 | 0.24907 | -0.84437 | -28.1455  |      | 3.395 | 1.2223  |
| 2       | 14.46 | 0.22445  | 425.1420<br>1    | 104705    | 111000  | 3    | 848800   | #####    | 11.22267 | 0.22445 | -0.95185 | -31.72824 |      | 3.234 | 1.17372 |
| 3       | 14.52 | 0.25708  | 427.2295<br>3    | 146390    | 797000  | 3    | 1.1797E6 | #####    | 12.85397 | 0.25708 | -0.83598 | -27.86596 |      | 3.312 | 1.19755 |
| 4       | 14.66 | 0.24227  | 434.5368<br>5    | 112450    | 297000  | 3    | 324000   | #####    | 12.11365 | 0.24227 | -0.8409  | -28.02996 |      | 3.516 | 1.25732 |
| 5       | 14.84 | 0.27911  | 706.8592<br>5    | 123008    | 2E6     | 5    | 5.191E6  | #####    | 13.95536 | 0.27911 | -0.78963 | -26.32114 |      | 3.845 | 1.34677 |
| 6       | 14.86 | 0.22599  | 726.5078<br>9    | 86898.1   | 170000  | 3    | 173000   | #####    | 11.29952 | 0.22599 | -0.71115 | -23.70488 |      | 3.887 | 1.35764 |
| 7       | 15.02 | 0.25688  | 731.6728<br>3    | 103970    | 960000  | 3    | 4.559E6  | 3.17E-10 | 12.84421 | 0.25688 | -0.76377 | -25.45914 |      | 4.287 | 1.45559 |
| 8       | 13.48 | 0.29047  | 750.3923<br>3    | 292102    | 4.45E7  | 1    | 4.4736E7 | #####    | 14.52364 | 0.29047 | -0.78874 | -26.29131 |      | 2.442 | 0.89282 |
| 9       | 13.27 | 0.2937   | 751.4854<br>4    | 224218    | 4.02E7  |      |          |          |          |         |          |           |      |       |         |
| 10      | 13.17 | 0.31201  | 763.5096<br>4    | 269491    | 2.452E7 |      |          |          |          |         |          |           |      |       |         |
| 11      | 13.33 | 0.29845  | 772.4184<br>9    | 150203    | 1.17E7  |      |          |          |          |         |          |           |      |       |         |
| 12      | 13.08 | 0.33451  | 811.5244<br>8    | 155569    | 3.31E7  |      |          |          |          |         |          |           |      |       |         |

Set Values - [Book2]Sheet1!Col(H)

Formula wcol(1) Col(A) F(x) Variables

Row(i): From <auto> To <auto>

Col(H) =

$$\ln((\text{col}(C) * \text{col}(F)) / (\text{col}(A) * 1e-7 * \text{col}(B) * \text{col}(E)))$$

Recalculate None

Apply Cancel OK

## Representative plots

### Electron excitation temperature

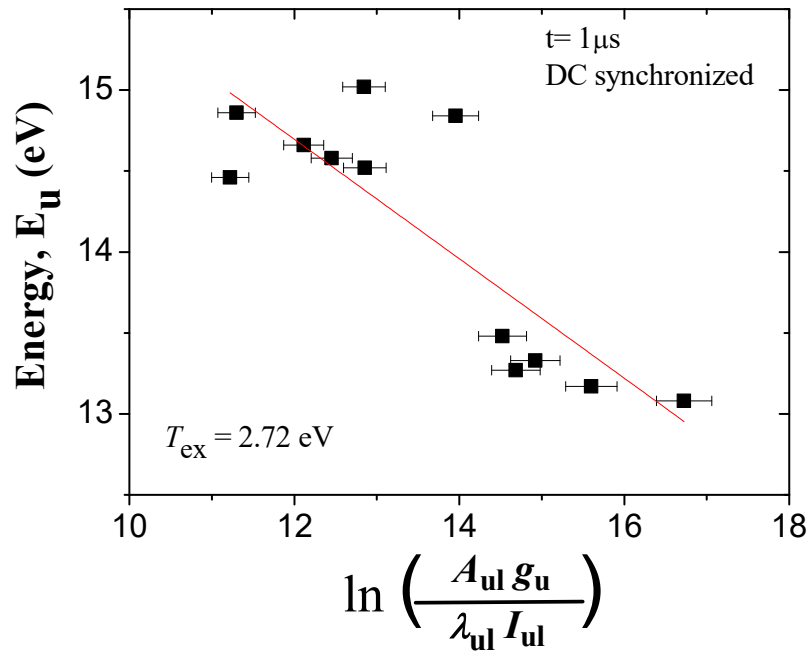

$$\frac{E_u}{k_B T_{ex}} = \ln \left( \frac{g_u \cdot A_{ul}}{I_{ul} \cdot \lambda_{ul}} \right) + \text{constant}$$

### Electron temperature

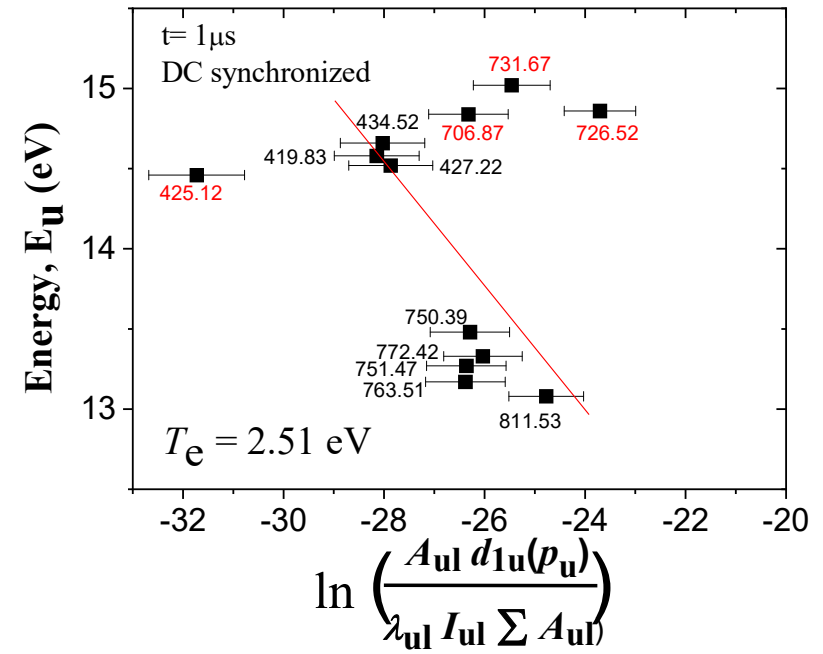

$$\frac{E_{1u}}{k_B T_e} = \ln \left\{ \frac{A_{ul} d_{1u}(p_u)}{\lambda_{ul} I_{ul} \sum_{u'l} A_{ul}} \right\} + \text{constant}$$

# Time evolution of parameters: $T_{ex}$ and $T_e$

Time variation: During glow and after glow

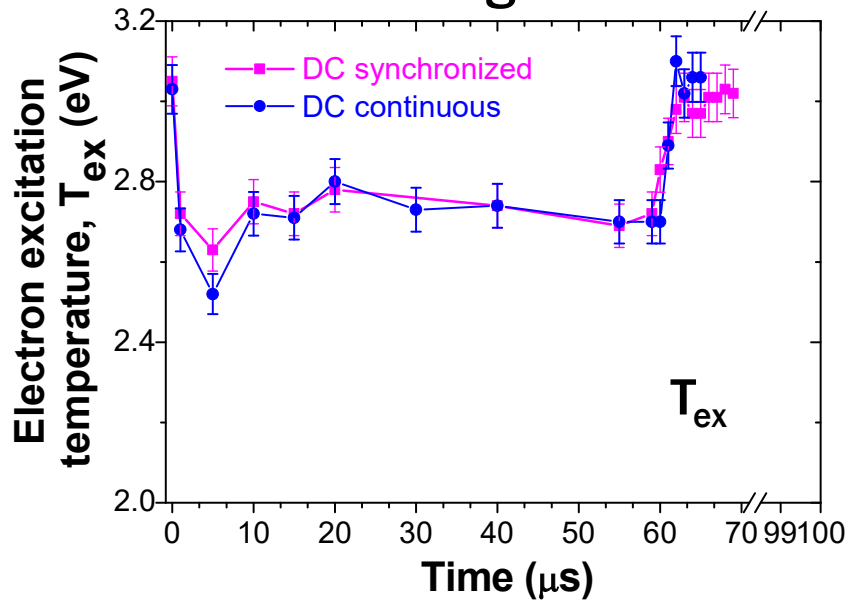

Time variation: During glow and after glow

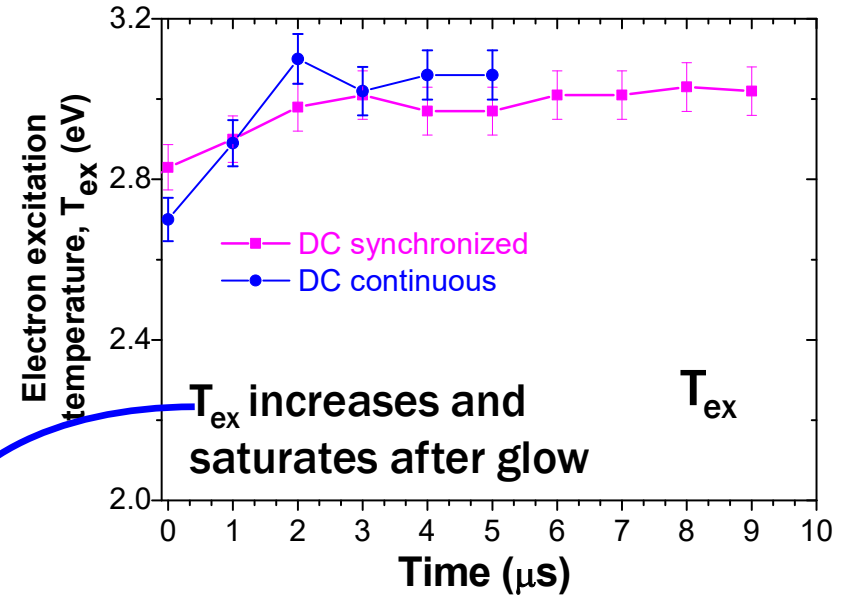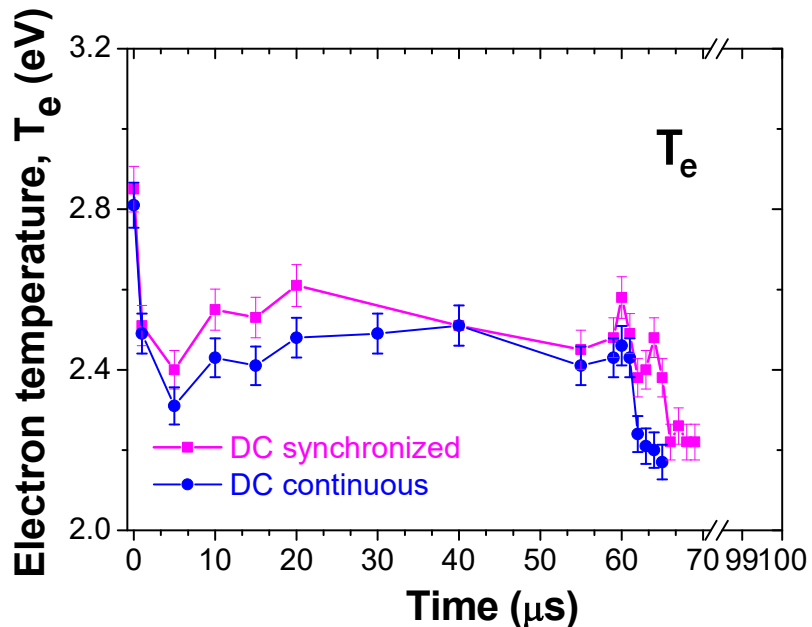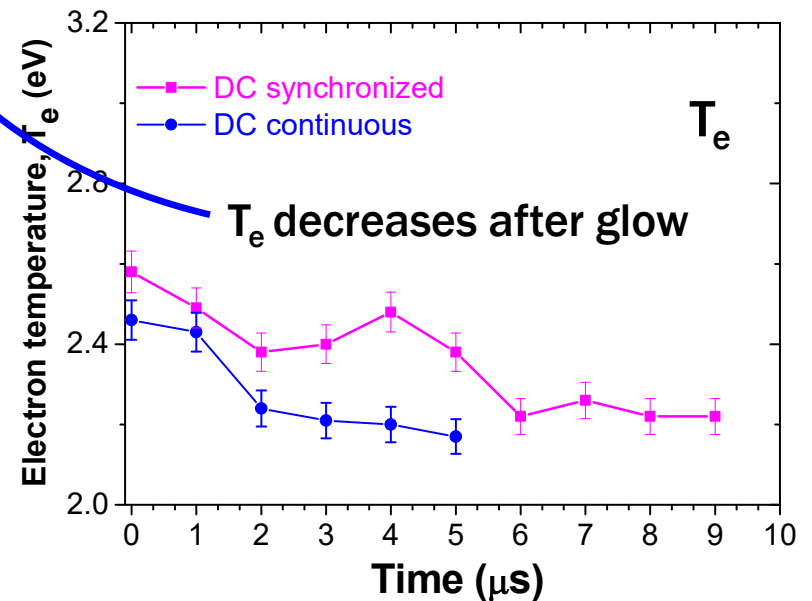

# Determination of Plasma density ( $n_e$ ) from OES data

1. The **Saha equation** (or equilibrium) describes the degree of ionization for any gas in **thermal equilibrium** as a function of the temperature, density, and ionization energies of the atoms
2. **Maxwell-Boltzmann distribution** is used for describing particle in plasma (as a fluid), where the particles exchange energy and momentum with each other or with their thermal environment.
  - **Formulation of equation for  $n_e$  using Saha and Maxwell-Boltzmann equations**
  - **Variation of  $n_e$  with RF pulse condition**

We approach the Saha equation through the Einstein transition probabilities while making use of the Boltzmann equation.

- We consider two lines: 419.83 nm (Ar atom) and 423.72 nm (Ar<sup>+</sup>) to determine  $n_e$ . Applying Boltzmann equation, we get the line intensity ratio as

$$\frac{I_{419.83}}{I_{423.72}} = \left( \frac{\lambda_{423.72} \cdot A_{419.83} \cdot N_{419.83} \cdot g_{419.83} \cdot U_{423.72}(T_e)}{\lambda_{419.83} \cdot A_{423.72} \cdot N_{423.72} \cdot U_{419.83}(T_e)} \right) \cdot \exp\left( -\frac{E_{419.83} - E_{423.72}}{k_B T_e} \right) \quad (13)$$

The subscript 419.83 and 423.72 represents the emissions from Ar atom and ions, respectively.  $N_{419.83}$  and  $U_{419.83}$  = densities of excited atoms and partition function relevant to emissions of wavelength 419.83 nm

$N_{423.72}$  and  $U_{423.72}$  = densities of excited atoms and partition function relevant to emissions of wavelength 423.72 nm

Applying Saha equation, we get the number density ratio involving atomic excitation and ionization as

$$\frac{n_e N_{423.72}}{N_{419.83}} = \frac{2U_{423.72}(T_e)}{U_{419.83}(T_e)} \cdot \frac{(2\pi m_e k_B T_e)^{3/2}}{h^3} \cdot \exp\left( -\frac{E_{Ar} - \Delta E_{Ar}}{k_B T_e} \right) \quad (14)$$

Substituting Eqn. (14) in Eqn. (13), we get the expression for plasma density as

$$n_e = 2 \cdot \frac{(2\pi m_e k_B)^{3/2}}{h^3} \left( \frac{I_{419.83} \cdot A_{423.72} \cdot g_{423.72} \cdot \lambda_{419.83}}{I_{423.72} \cdot A_{419.83} \cdot g_{419.83} \cdot \lambda_{423.72}} \right) \cdot T_e^{3/2} \exp\left( \frac{-E_{Ar} + \Delta E_{Ar} + E_{423.72} - E_{419.83}}{T_e} \right) \quad (15)$$

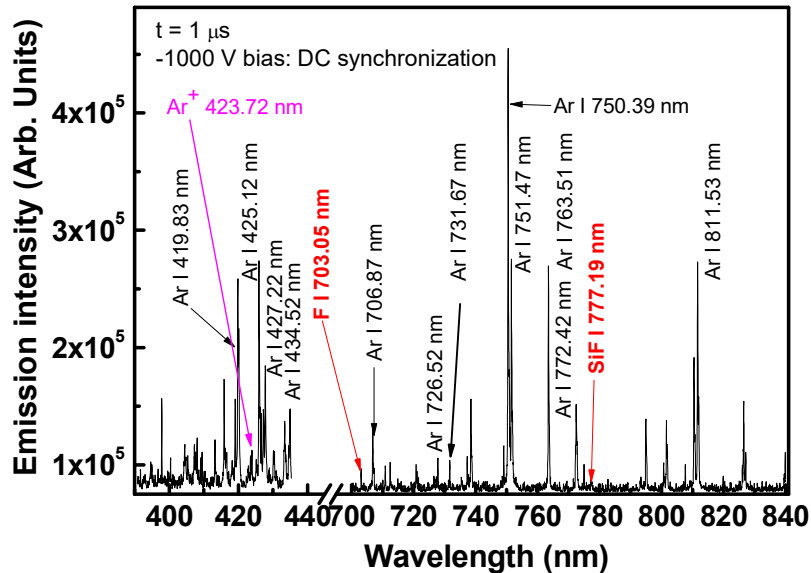

- Two select lines from our measurements 419.83 nm (Ar atom) and 423.72 nm (Ar<sup>+</sup>) are chosen to ( $n_e$ ).
- We need the value of  $T_e$  to calculate  $n_e$

$$n_e = 2 \cdot \frac{(2\pi m_e k_B)^{3/2}}{h^3} \left( \frac{I_{419.83} \cdot A_{423.72} \cdot g_{423.72} \cdot \lambda_{419.83}}{I_{423.72} \cdot A_{419.83} \cdot g_{419.83} \cdot \lambda_{423.72}} \right) \cdot T_e^{3/2} \exp\left(\frac{-E_{Ar} + E_{423.72} - E_{419.83}}{T_e}\right) \quad (15)$$

| Wavelength<br>$\lambda$ (nm) | Parameters                                                                                       | Emission intensity                                  | Other Comments      |
|------------------------------|--------------------------------------------------------------------------------------------------|-----------------------------------------------------|---------------------|
| Ar I-419.83                  | $g_{419.83} = 1;$<br>$E_{419.83} = 14.58$ eV<br>$A_{419.83} = 0.257 \times 10^7$ s <sup>-1</sup> | $I_{419.83}$ = measured intensity of 419.83 nm line | $E_{Ar} = 15.76$ eV |
| Ar <sup>+</sup> -423.72      | $g_{423.72} = 4;$<br>$E_{423.72} = 37.11$ eV<br>$A_{423.72} = 1.12 \times 10^7$ s <sup>-1</sup>  | $I_{419.83}$ = measured intensity of 423.72 nm line |                     |

Time variation: During glow and after glow

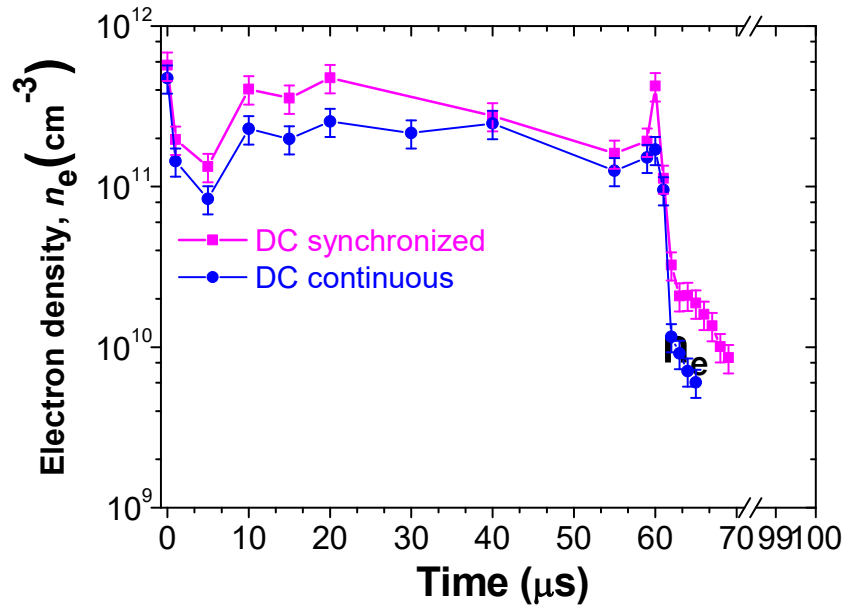

Time variation: During glow and after glow

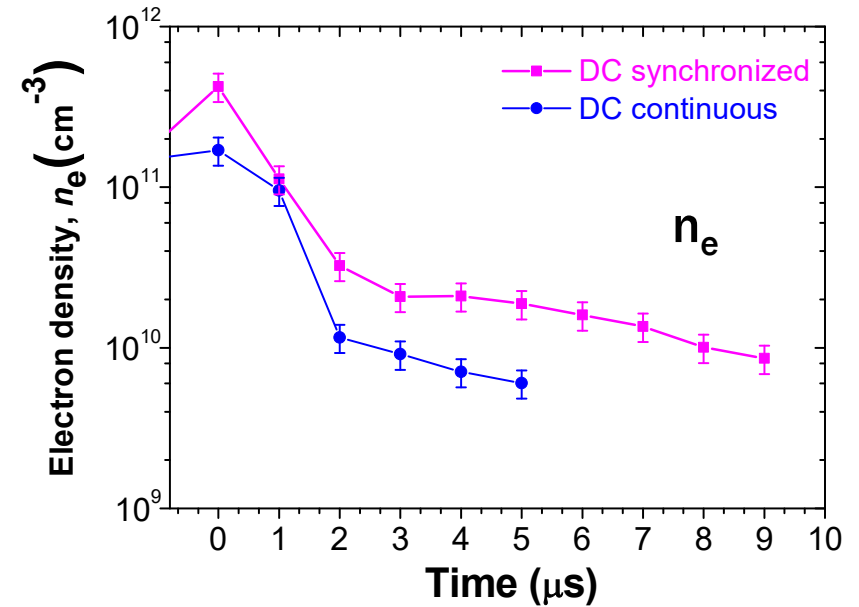

$n_e$  falls rapidly in DC continuous mode compared to that of DC synchronized mode.



# Comparison with earlier low power and different gas flow experiment

$n_e$  = decay rate of  $\sim 4.0 \times 10^5 \text{s}^{-1}$

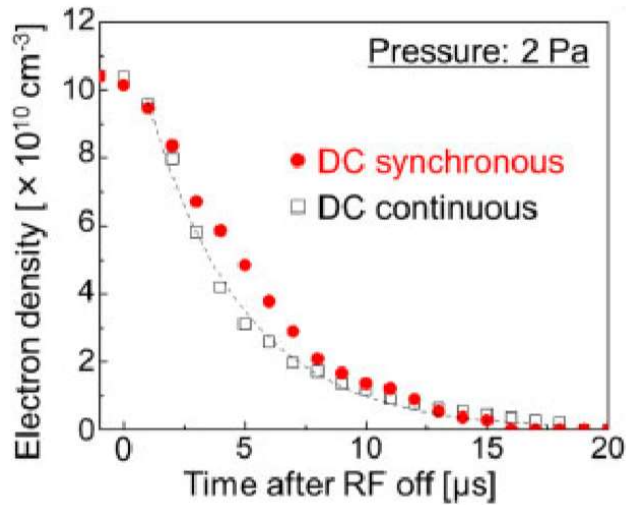

**Earlier experiment:**

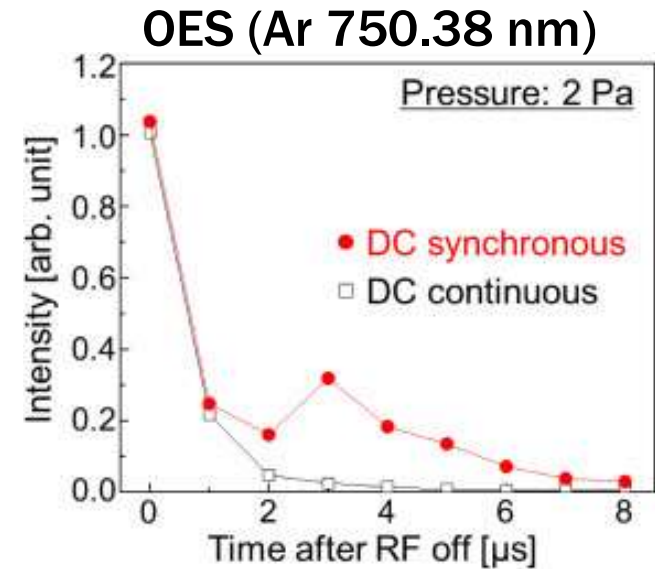

**Earlier experiment: Different gas flow by Surface wave probe**  
 40 MHz/3 MHz powers = 1000 W/2000 W  
 Ar/O<sub>2</sub>/C<sub>4</sub>F<sub>8</sub> flow rate in sccm = 100/100/100

Ohya et al. Jpn. J. Appl. Phys. 56, 06HC03 (2017)

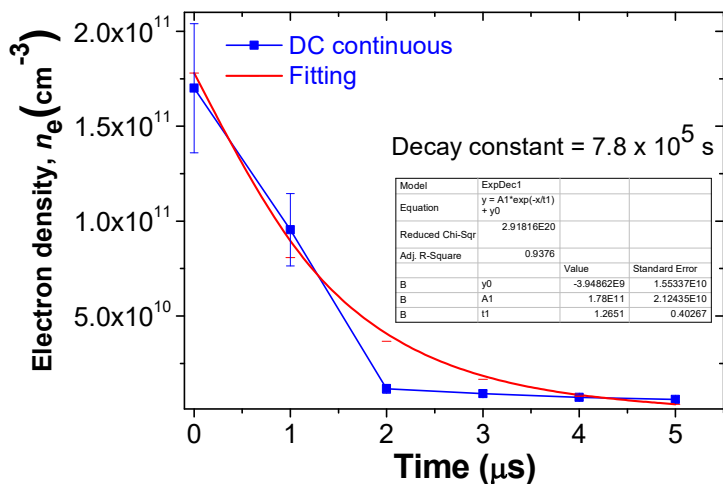

**Present experiment:**

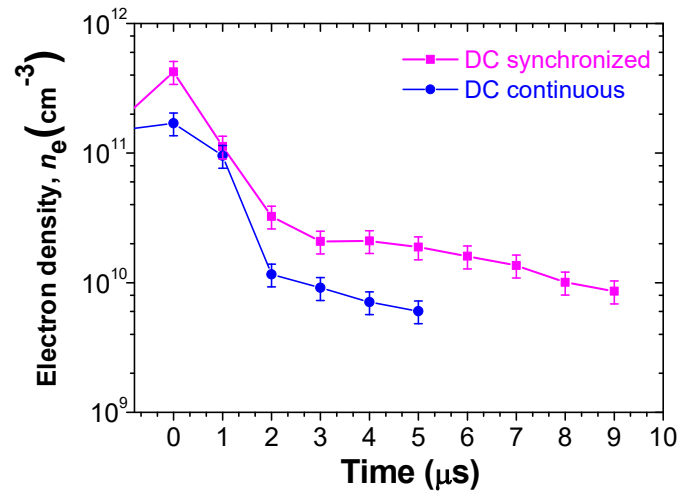

**We can not make exponential fit for the case of DC synchronized case.**

**Present experiment: Ar rich plasma by OES**  
 40 MHz/3 MHz powers = 1000 W/2000 W  
 Ar/O<sub>2</sub>/C<sub>4</sub>F<sub>8</sub> flow rate in sccm = : 300/30/60

# **Summary / Conclusion**

- **Scientific aspect**
- **Relevance to etching process**
- **Relevance to corona approximation**

# Overall variation of $T_e$ and $n_e$ with pulse

Time variation: During glow and after glow

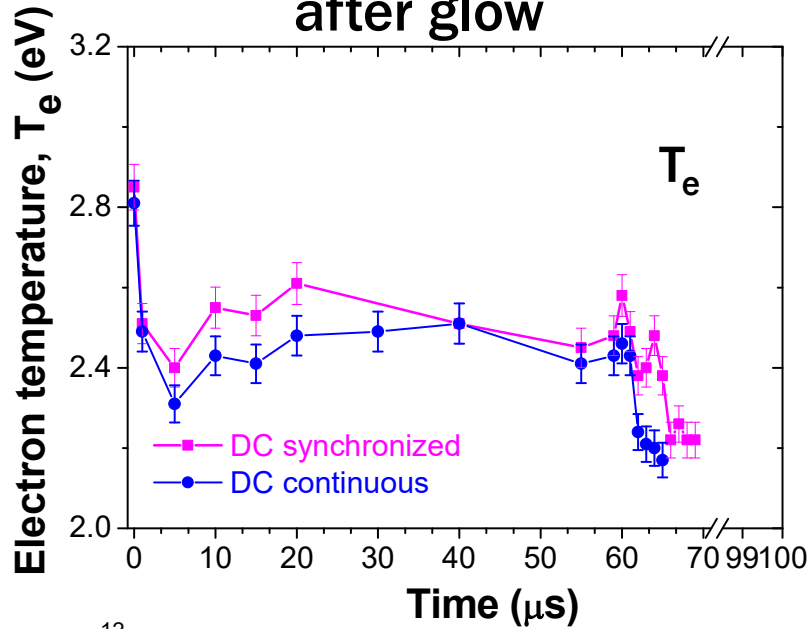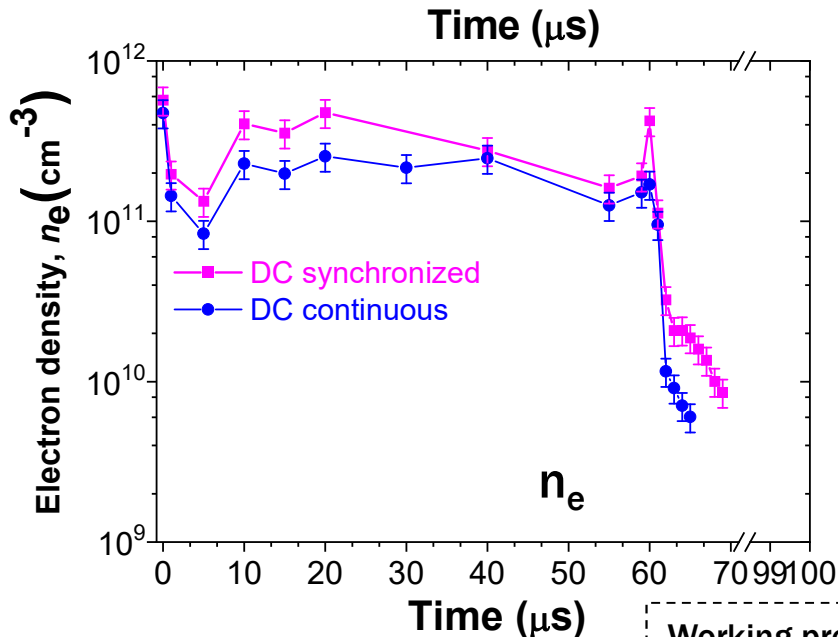

Time variation: During glow and after glow

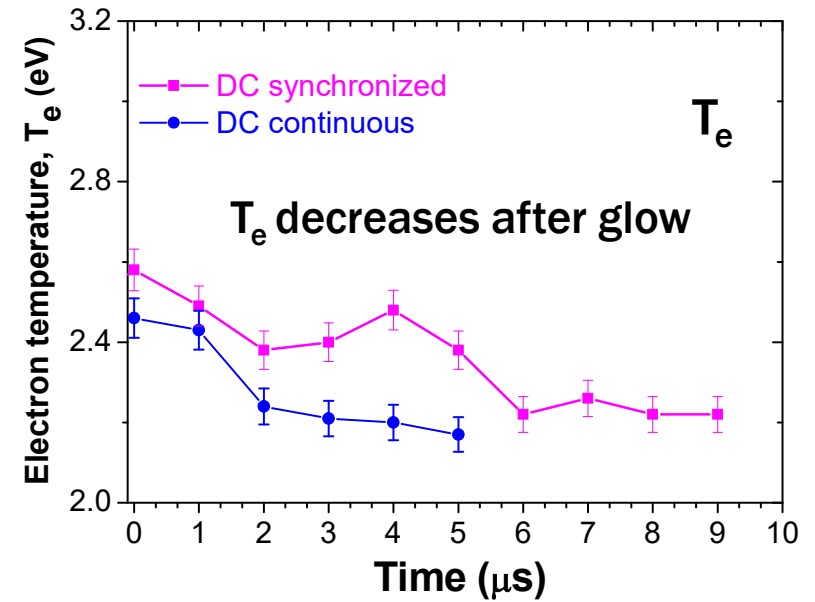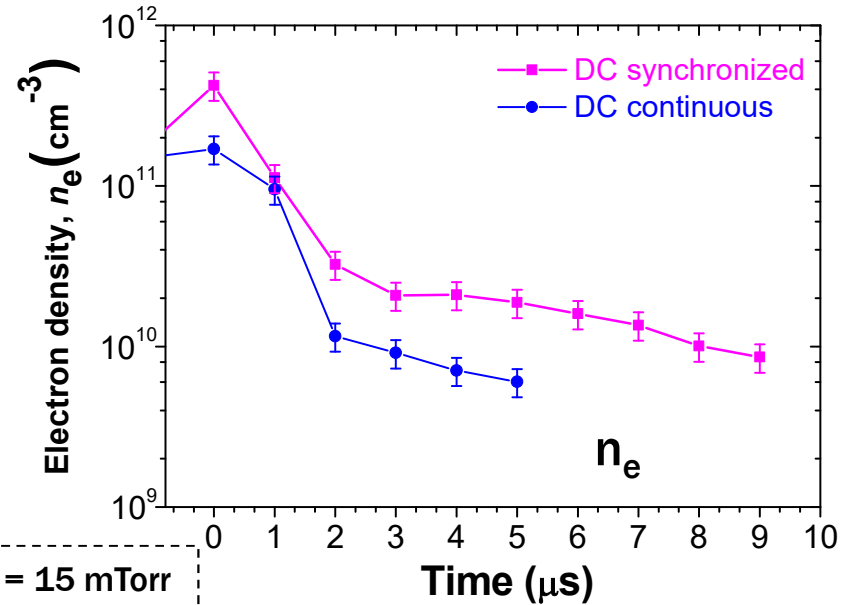

Working pressure = 2Pa = 15 mTorr  
Neutral density =  $4.8 \times 10^{14}$   $\text{cm}^{-3}$   
Plasma density  $\sim 10^9 - 10^{11}$   $\text{cm}^{-3}$

## Comparison of our experimental data with Fujimoto's work

- The electron density ( $n_e$ ) in the system of excited levels determines the population density of all excited levels represented by the effective principal quantum number  $p_u$ .
- Fujimoto,<sup>[14]</sup> in his work, has determined the dependence of  $p_u$  on  $n_e$  by the phase diagram.
- Phase diagram shows three stages of plasmas including the corona phase.
- Data in our experiments show that
$$2 < p_u < 4.3 \text{ (Table 1)}$$
$$n_e \text{ (maximum)} \sim 10^{11} \text{ cm}^{-3}$$

## Dependence of $p_u$ on $n_e$

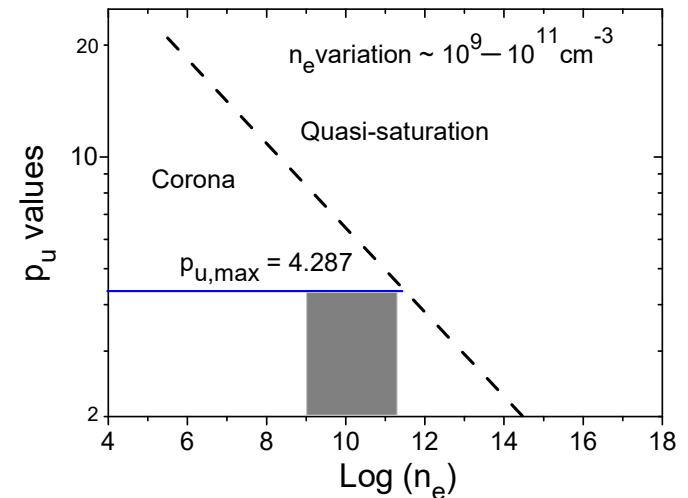

J. Phys. Soc. Japan 47, 273 (1979).

The present results suits favorably with the corona stage, and hence, corona approximation is well validated

## Flow of electrons in the energy level phase diagram for our measurements

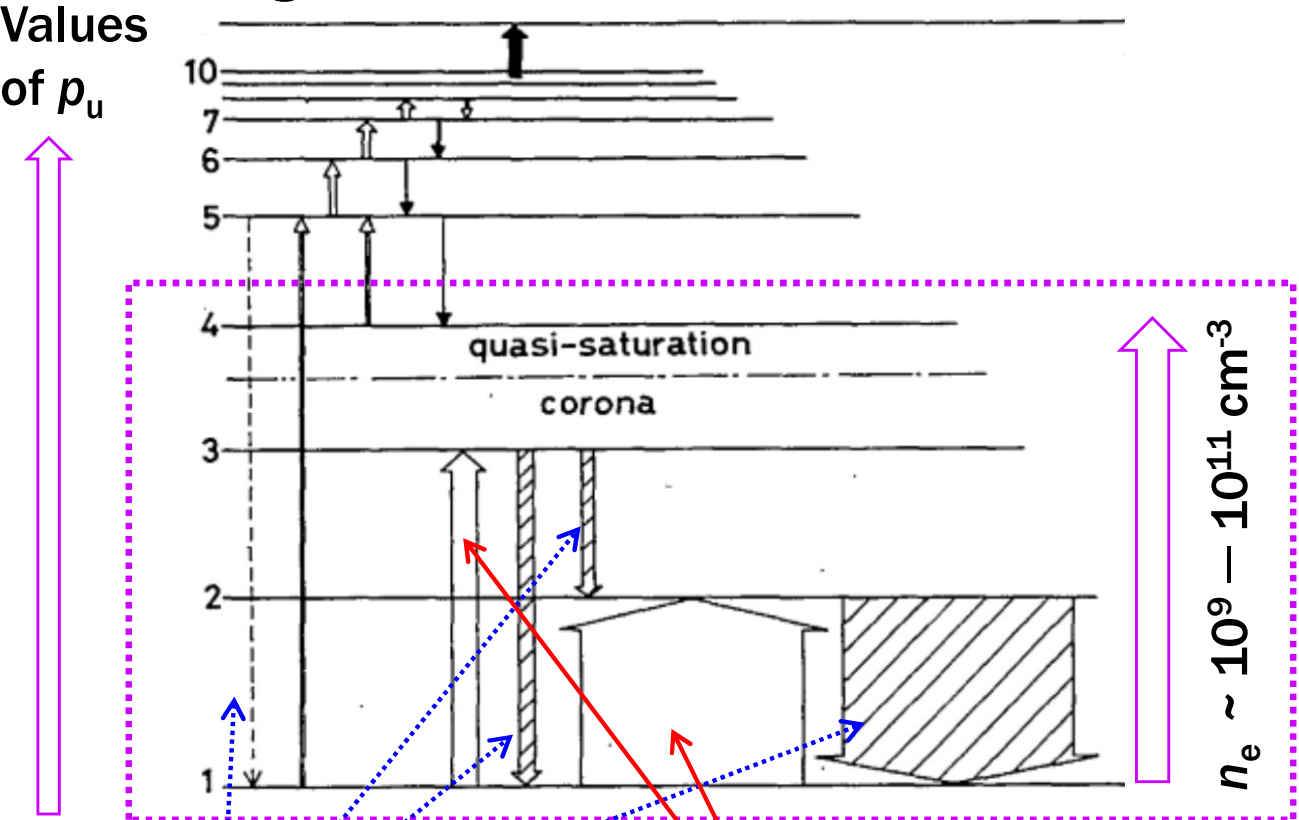

## Fujimoto's work

### Dependence of $p_u$ on $n_e$

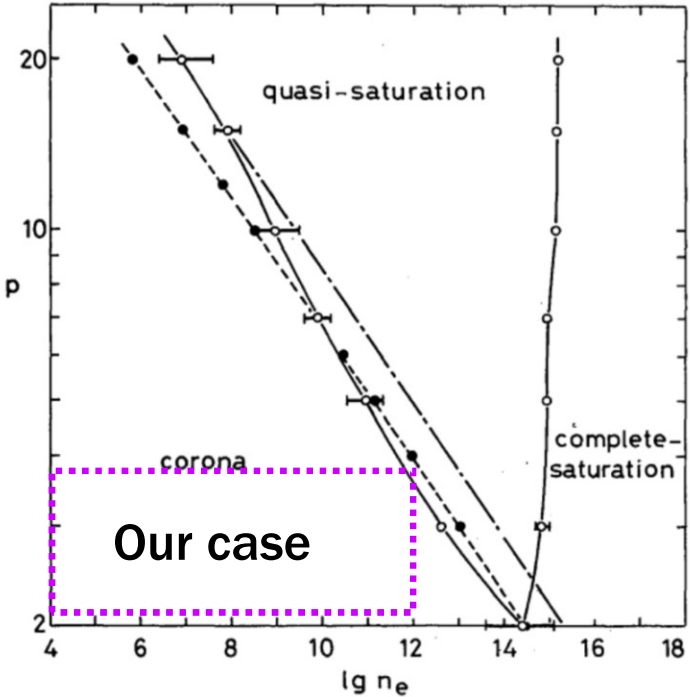

J. Phys. Soc. Japan 47, 273 (1979).

Radiative transition  
(De-populating process)

Populating process is dominantly by the direct excitation from the ground ( $p_u = 1$ ) level, while the small contribution comes from the cascade from higher levels ( $p \geq 5$ ), which are not observed in OES experiments.

# S<sub>11</sub>/S<sub>21</sub> parameters monitoring for Filter tuning: for NUTEC system

Tuning for ~ 40.68 MHz & 3.2 MHz

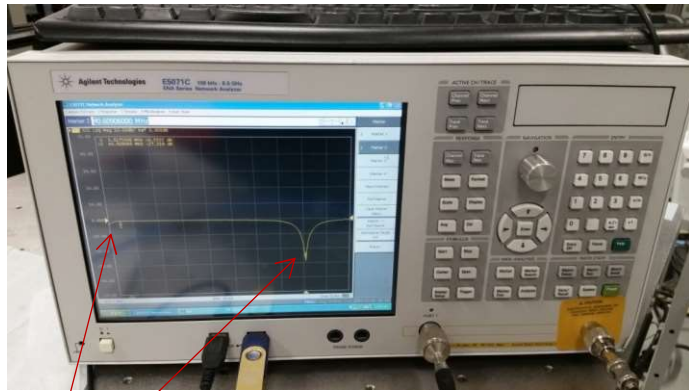

S<sub>21</sub> parameter at two excited frequencies.

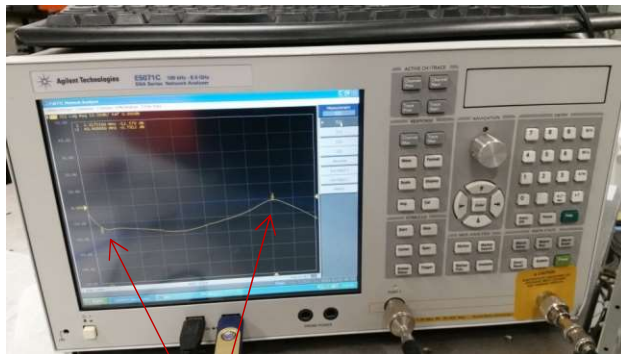

S<sub>11</sub> parameter at two frequencies

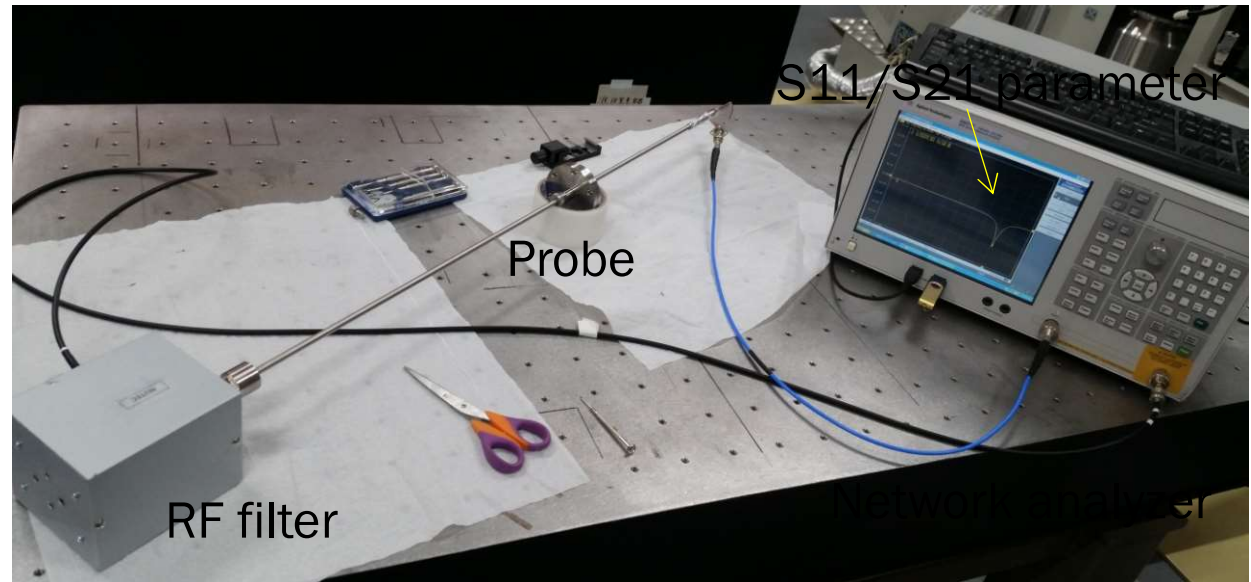

# LP I-V data Measurement: Validation our OES data using RF compensated Langmuir probe

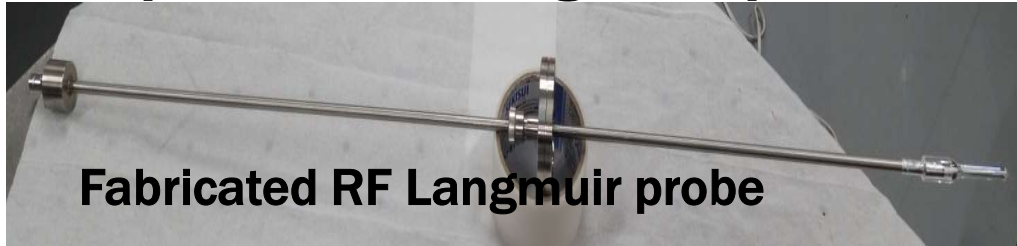

Fabricated RF Langmuir probe

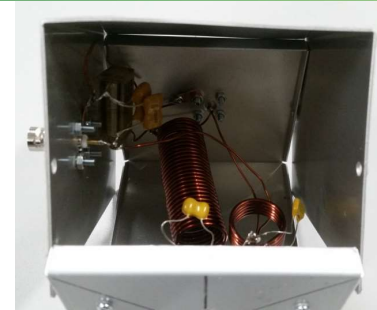

RF compensating Filter circuit

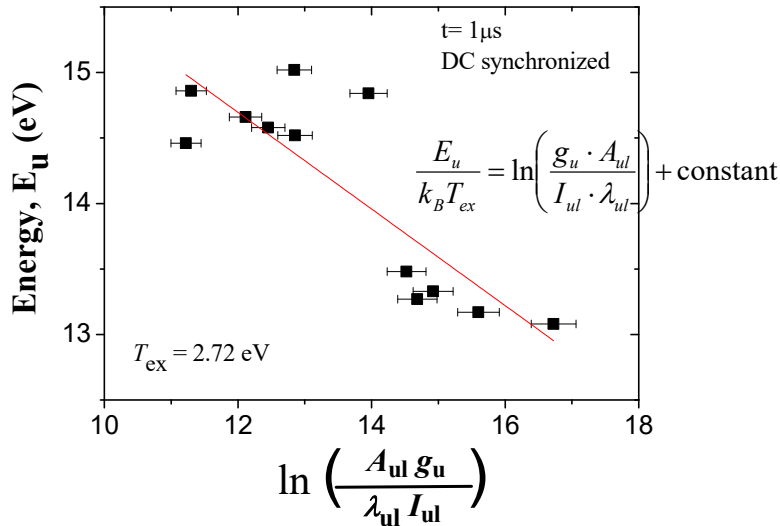

We will report our work on detailed design of RF Langmuir probe and LP measurements in future work.

LP measurement in discharge at  $1 \mu\text{s}$

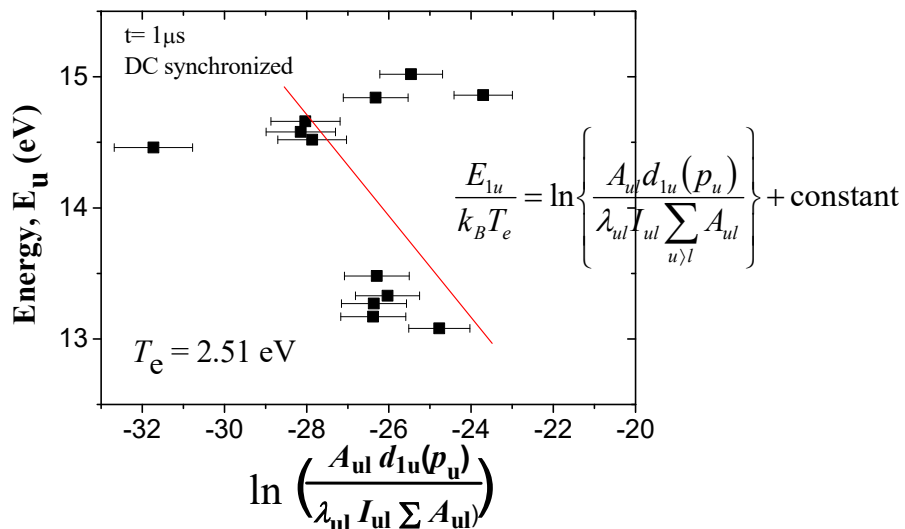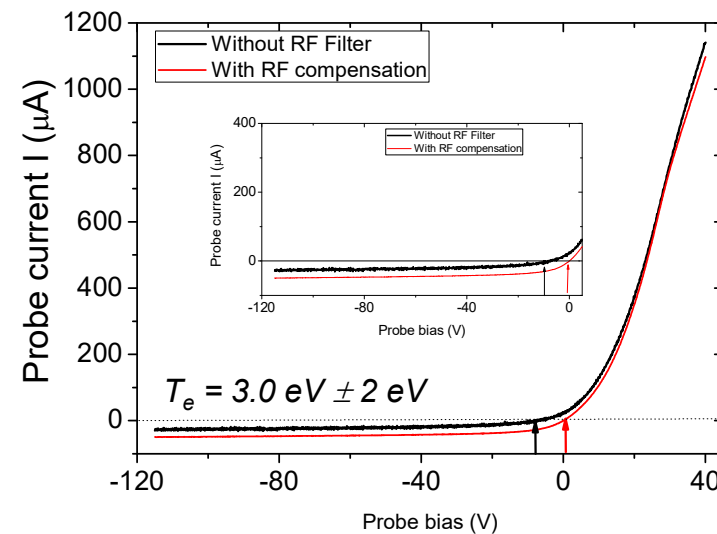

1. Spectroscopic study in dual frequency commercial CCP plasmas at low-pressure is undertaken for an etching process.
2. Corona plasma approximation is realized for our operating condition of low pressure plasma with low to moderate plasma density.
3. Plasma parameters like  $T_e$  and  $n_e$  were determined in relation to the Applied RF pulsed power.
4. Over the course of one pulse period it is observed that both  $T_e$  and  $n_e$  increases during on-phase and decays during the off-phase. Both  $T_e$  and  $n_e$  are synchronized with the RF pulse.
5. In RF pulse off phase, most electron disappears and negative ions can be expected to generate by the electron attachment process to maintain the plasma neutrality by positive and negative ions.
6. In pulsed CCP plasmas during the RF off-period,  $T_e$  drops while maintaining the plasma of very low  $n_e$ .  $T_e$  in the Synchronized phase enhances compared to continuous mode due to higher electronegativity in afterglow.
7. Corona plasma approximation is well validated by the experimental results.



**Thank you !**
